# Supplementary material for: Formation of trinitromethyl functionalized 1,2,4-triazole-based energetic ionic salts and a zwitterionic salt directed by an intermolecular and intramolecular metathesis strategy
Source: Royal Society of Chemistry journal article supplement (doi:10.1039/c7nj03939e), 2018-01-01
Supplement: c7nj03939e1.pdf [file c7nj03939e1.pdf]

## Supporting Information

### Formation of trinitromethyl functionalized 1,2,4-triazole-based energetic ionic salts and a zwitterionic salt directed by a intermolecular and intramolecular metathesis strategy

Qing Ma,<sup>†a</sup> Hao Gu,<sup>†b</sup> Jinglun Huang,<sup>a</sup> Fude Nie,<sup>a</sup> Guijuan Fan,<sup>\*a</sup> Longyu Liao<sup>\*a</sup>

and Wei Yang<sup>\*c</sup>

<sup>a</sup> Institute of Chemical Materials, Chinese Academy of Engineering Physics, P.O.Box 919-311, Mianyang, China

<sup>b</sup> School of Chemical Engineering, Nanjing University of Science and Technology, Xiaolingwei 200, Nanjing, China

<sup>c</sup> Department of chemistry and chemical biology, Harvard University, Cambridge, Massachusetts, 02138, USA

\*e-mail: fanguijuan@caep.cn, liaolongyu@caep.cn & wei\_yang@fas.harvard.edu

### Contents

|                                                                        |     |
|------------------------------------------------------------------------|-----|
| 1. Experimental section.....                                           | S2  |
| 2. Crystal structure and crystalline parameters.....                   | S4  |
| 3. DSC plot for the title compounds.....                               | S18 |
| 4. <sup>1</sup> H and <sup>13</sup> C NMR for the title compounds..... | S21 |
| 5. Computational details.....                                          | S26 |

## Experimental section

### Safety cautions

Although none of the above energetic poly-nitro triazoles described herein have exploded or detonated in the course of this research, small scale and safety training are strongly encouraged. Mechanical actions such as scratching and scraping must be avoided. Manipulations should be performed behind a safety shield with standard thickness of 7 mm or 12 mm. Face shield, eye protection and leather gloves must be strictly worn.

### General method

All chemicals or reagents used in this research were analytical grade materials purchased from Alfa Aesar or J&K, if not stated otherwise.  $^1\text{H}$ ,  $^{13}\text{C}$  and  $^{15}\text{N}$  spectra were recorded using a 600 MHz (Bruker AVANCE III 600) nuclear magnetic resonance spectrometer operating at 600, 150.85, 50.68 MHz, respectively. Chemical shifts in the  $^1\text{H}$  and  $^{13}\text{C}$  spectra are reported relative to  $\text{Me}_4\text{Si}$  and  $^{15}\text{N}$  NMR to  $\text{MeNO}_2$  as external standards. The decomposition (onset) points were obtained on a differential scanning calorimeter-thermal gravity (TGA/DSC1, METTLER TOLEDO LF/1100) at a heating rate of  $5\text{ }^\circ\text{C min}^{-1}$ . Infrared (IR) spectra were measured on Thermofisher Nicolet 800 FT-IR spectrometer in the range of  $4000\text{--}400\text{ cm}^{-1}$  as KBr pellets at  $20^\circ\text{C}$ . Elemental analyses (C,H,N) were carried out on a elemental analyzer (Vario EL Cube, Germany). Densities were measured on a Micromeritics Accupyc II 1340 gas pycnometer at ambient temperature.

### X-ray crystallography

A colorless plate crystal (**4**·**2H<sub>2</sub>O**) of dimensions  $0.14\times 0.10\times 0.05\text{ mm}^3$ , a colorless plate crystal (**5**·**2H<sub>2</sub>O**) of dimensions  $0.12\times 0.10\times 0.05\text{ mm}^3$ , and an orange prism crystal (**14**) of dimensions  $0.15\times 0.12\times 0.10\text{ mm}^3$  were mounted on a MiteGen MicroMesh using a small amount of Cargille Immersion Oil. Data were collected on a Bruker three-circle platform diffractometer equipped with a SMART APEX II CCD detector. A Kryo-Flex low-temperature device was used to keep the crystals at a constant 296 K, 173 K and 130 K during data collection. Data collection was performed and the unit cell was initially refined using APEX2. Data reduction was carried out using SAINT and XPREP. Corrections were applied for Lorentz, polarization, and absorption effects using SADABS. The structures were further solved and refined with the aid of the programs using direct methods and least-squares minimization by SHELXS-97 and SHELXL-97 code.<sup>1</sup> The full-matrix least-squares refinement on  $F^2$  involved atomic coordinates and anisotropic thermal parameters for all non-H atoms. The H atoms were included using a riding model. The non-H atoms were refined anisotropically. The finalized CIF files were checked with checkCIF, and deposited at the Cambridge Crystallographic Data Centre as supplementary publications (4·2H<sub>2</sub>O), (5·2H<sub>2</sub>O), and (14). Intra- or intermolecular hydrogen-bonding interactions were analyzed with Diamond software (version 3.2K) as well as the illustrations of molecular structures.

### Syntheses

Oxamidrazone (**2**) and 2-(5-amino-1H-1,2,4-triazol-3-yl) acetic acid (**12**) were synthesized according to the literature.<sup>2</sup>

**5,5'-bis(acetic acid)-3,3'-bi-1H-1,2,4-triazole (4)**. **3** was synthesized by a slightly modified version of a previously published procedure.<sup>3</sup> To acetic acid (70 mL), a mixture of oxamidrazone (**2**) (5.7 g, 49 mmol) and ethyl-3-ethoxy-3-iminopropionate hydrochloride (23 g, 118 mmol) was added at room temperature. After stirring for 10 min at  $50\text{--}60^\circ\text{C}$ , the suspension was stirred for another 1h at  $110^\circ\text{C}$ . Then the mixture was cooled to the room temperature and poured into ice water (200 mL) under stirring, and was neutralized by potassium bicarbonate till the pH value was 7 at  $5\text{--}10^\circ\text{C}$ . The precipitate was filtered and washed with water to give 5,5'-bis(acetic acid ethyl ester)-3,3'-bi-1H-1,2,4-triazole (**3**) (18.9 g, yield 52.0 %). Then **3** (18.9 g, 61 mmol) was added in portions to a mixture of sodium hydroxide (18.9 g, 47 mmol) and water (95 mL) (about 0.5M NaOH solution) at  $10^\circ\text{C}$ . After being stirred for 2 h, the mixture was cooled to  $0^\circ\text{C}$  and acidified with 2M nitrate acid (the pH was adjusted to 3–4). The precipitate was filtered, washed with cold water, and dried in air to give product **4** (10.6 g, 69.0 %). Brownish solid.  $^1\text{H}$  (DMSO- $d_6$ ):  $\delta=14.76$  (s, 2H), 3.81 (s, 4H) ppm.

**5,5'-bis(trinitromethyl)-3,3'-bi-1H-1,2,4-triazole (5)**. To 96%  $\text{HNO}_3$  (23 mL), 5,5'-bis(acetic acid)-3,3'-bi-1H-1,2,4-triazole (**2**) (3 g, 12 mmol) was added slowly with portions at  $-15^\circ\text{C}$ . After being stirred for 30 min, conc.  $\text{H}_2\text{SO}_4$  (98 %, 50 mL) was added dropwise below  $0^\circ\text{C}$ . The mixture was slowly warmed up to the room temperature and stirred for at least 16 h. Then the mixture was slowly poured into ice water (200 mL) under stirring. The precipitate was filtered, washed with cold water and dried in the oven under  $30^\circ\text{C}$  with

vacuum to give product **3** (2.66 g, 51.6 %). White solid.  $T_d$ : 148°C.  $^1\text{H}$  (DMSO- $d_6$ ):  $\delta$ =7.34 (s, 2H) ppm;  $^{13}\text{C}$  (DMSO- $d_6$ ):  $\delta$ =149.27, 148.85 ppm; IR (KBr pellet): 3651 (w), 3467 (m), 2878 (w), 2695 (w), 1609 (s), 1594 (s), 1529 (w), 1440 (w), 1408 (w), 1284 (m), 1185 (w), 1080 (w), 988 (w), 957 (w), 844 (m), 800 (m), 733 (w), 675 (w), 641 (w), 621 (w)  $\text{cm}^{-1}$ . Elemental analysis calcd (%) for  $\text{C}_6\text{H}_2\text{N}_{12}\text{O}_{12}$  (434.15): C 16.60, H 0.46, N 38.71; found: C 16.72, H 0.58, N 38.52.

**Diammonium 5,5'-bis(trinitromethyl)-3,3'-bi-1,2,4-triazolate (6).**

5,5'-bis(trinitromethyl)-3,3'-bi-1H-1,2,4-triazole (**5**) (0.50 g, 1.2 mmol) was dissolved in anhydrous methanol (8 mL) and then an ammonia solution (2.5 mL, 7N in methanol) was added dropwise. The resulting clear solution was stirred at 50 °C for another 2 h and filtered. The filtrate was cooled to the room temperature and the solvent was removed by blowing air. The remaining solids were washed with deionized water (2 mL) and then ethyl ether (2 mL) and dried in air to give **6** (0.45 g, 80%). Orange solid.  $T_d$ : 188°C.  $^1\text{H}$  (DMSO- $d_6$ ):  $\delta$ =7.14 (s, 8H) ppm;  $^{13}\text{C}$  (DMSO- $d_6$ ):  $\delta$ =152.77, 151.08, 125.30 ppm; IR (KBr pellet): 3251 (s), 3056 (s), 2114 (w), 1690 (m), 1596 (m), 1423 (s), 1336 (m), 1229 (m), 1134 (w), 1098 (w), 1041 (w), 984 (w), 842 (w), 827 (w), 799 (w), 746 (w), 718 (w), 617 (w)  $\text{cm}^{-1}$ . Elemental analysis for  $\text{C}_6\text{H}_8\text{N}_{14}\text{O}_{12}$  (468.21): C 15.39, H 1.72, N 41.88; found: C 15.57, H 1.85, N 41.59.

**Dihydrazinium 5,5'-bis(trinitromethyl)-3,3'-bi-1,2,4-triazolate (7).**

5,5'-bis(trinitromethyl)-3,3'-bi-1H-1,2,4-triazole (**5**) (0.50 g, 1.2 mmol) was dissolved in anhydrous methanol (8 mL) and then two equivalents of hydrazine monohydrate (0.13 g, 2.5 mmol) was added dropwise. Orange precipitate appeared immediately. The resulting mixture was stirred at 50 °C for another 2 h and cooled to the temperature. The precipitate was collected by filtration and washed with anhydrous methanol (2 mL) to give the product **7** (0.49 g, 82%). Orange solid.  $T_d$ : 218°C.  $^1\text{H}$  (DMSO- $d_6$ ):  $\delta$ =7.16 (s, 10H) ppm;  $^{13}\text{C}$  (DMSO- $d_6$ ):  $\delta$ =168.17, 148.33, 124.58 ppm; IR (KBr pellet): 3345 (w), 3302 (s), 2984 (m), 2639 (m), 2130 (m), 1588(w), 1552 (w), 1473 (w), 1432 (w), 1388 (w), 1315 (w), 1265 (m), 1221 (m), 1098 (m), 969 (w), 819 (w), 739 (w), 704 (w)  $\text{cm}^{-1}$ . Elemental analysis for  $\text{C}_6\text{H}_{10}\text{N}_{16}\text{O}_{12}$  (498.24): C 14.46, H 2.02, N 44.98; found: C 14.75, H 2.18, N 44.67.

**Dihydroxylammonium 5,5'-bis(trinitromethyl)-3,3'-bi-1,2,4-triazolate (8).**

5,5'-bis(trinitromethyl)-3,3'-bi-1H-1,2,4-triazole (**5**) (0.50 g, 1.2 mmol) was dissolved in anhydrous methanol (8 mL) and then 50 % aqueous hydroxylamine (0.83 g, 2.5 mmol) was added dropwise. Orange precipitate appeared after 30 min. The resulting mixture was stirred at 50 °C for another 2 h and cooled to the temperature. The precipitate was collected by filtration and washed with anhydrous methanol (2 mL) to give the product **8** (0.55 g, 92 %). Orange solid.  $T_d$ : 191°C.  $^1\text{H}$  (DMSO- $d_6$ ):  $\delta$ =7.94 (s, 8H) ppm;  $^{13}\text{C}$  (DMSO- $d_6$ ):  $\delta$ =152.68, 150.96, 125.19 ppm; IR (KBr pellet): 3567 (w), 3186 (s), 2734 (m), 2116 (w), 1588 (w), 1531 (s), 1480 (w), 1433 (w), 1379 (w), 1360 (w), 1221 (m), 1124 (w), 1092 (w), 984 (w), 826 (w), 740 (w)  $\text{cm}^{-1}$ . Elemental analysis for  $\text{C}_6\text{H}_8\text{N}_{14}\text{O}_{14}$  (500.21): C 14.41, H 1.61, N 39.20; found: C 14.58, H 1.82, N 39.01.

**Dipotassium 5,5'-bis(trinitromethyl)-3,3'-bi-1,2,4-triazolate (9).** To a solution of potassium hydroxide (0.77 g, 3.1 mmol) in anhydrous ethanol (6 mL) was added a solution of hydroxylamine hydrochloride (0.48 g, 6.84 mmol) in water (1 mL). After stirring for 30 min, the potassium chloride was filtered and the filtrate was cooled to 0°C was added dropwise to a solution of 5,5'-bis(trinitromethyl)-3,3'-bi-1H-1,2,4-triazole (**5**) (0.67 g, 1.55 mmol) in ethanol (5 mL). The mixture was stirred for another 2–3 h and the precipitate was collected by filtration and washed with anhydrous methanol (2 mL) to give the product **9** (0.58 g, 89 %). Light-yellow solid.  $T_d$ : 161°C.  $^{13}\text{C}\{^1\text{H}\}$  (DMSO- $d_6$ ):  $\delta$ =154.82, 154.73, 129.70 ppm; IR (KBr pellet): 3589 (m), 3460 (m), 1630 (w), 1530 (m), 1438 (w), 1384 (m), 1270 (s), 1126 (s), 1046 (w), 994 (m), 972 (w), 822 (m), 751 (w), 685 (w), 618 (w), 675 (w), 481 (w), 445 (w)  $\text{cm}^{-1}$ . Elemental analysis for  $\text{C}_6\text{H}_2\text{K}_2\text{N}_{10}\text{O}_8$  (420.34): C 17.14, H 0.48, N 33.32; found: C 17.45, H 0.63, N 33.16.

**5-diazonium-3-trinitromethyl-1,2,4-triazolate (14).** To 96%  $\text{HNO}_3$  (35 mL) was added 5-amino-1,2,4-triazole-3-carboxyl acid (**12**) (8.65 g, 55 mmol) with portions at -15°C. After being stirred for 30 min, conc.  $\text{H}_2\text{SO}_4$  (98 wt%, 52 mL) was added dropwise below -5 °C. After addition, the mixture was allowed to slowly warm up to 25°C and stirred for another 16–24h. The mixture was poured into ice water (300 g) under stirring and extracted with dichloromethane (20×20 mL). The organic layer was dried over  $\text{Na}_2\text{SO}_4$ , and the solvent was evaporated to obtain product **14** (5.87 g, 43.8 %). Pale yellow solid.  $T_d$ : 127°C.  $^{13}\text{C}\{^1\text{H}\}$  (DMSO- $d_6$ ):  $\delta$ =149.93, 137.96, 122.90 ppm; IR (KBr pellet): 3444 (s), 2921 (w), 2361 (w), 2349 (w), 2338 (w), 2273 (w), 2245 (s), 2130 (w), 2075 (w), 1620 (s), 1596 (s), 1518 (w), 1458 (w), 1285 (m), 1178 (w), 1107 (w), 1067 (m), 1014 (w), 958 (w), 844 (m), 801 (s), 724 (w), 678 (w), 664 (w), 643 (w), 580 (w), 536 (w), 497 (w)  $\text{cm}^{-1}$ . Elemental analysis for  $\text{C}_3\text{N}_8\text{O}_6$  (244.08): C 14.76, H 0.00, N 45.91; found: C 14.48, H 0.11, N 46.12.

## Crystal structures and crystalline parameters

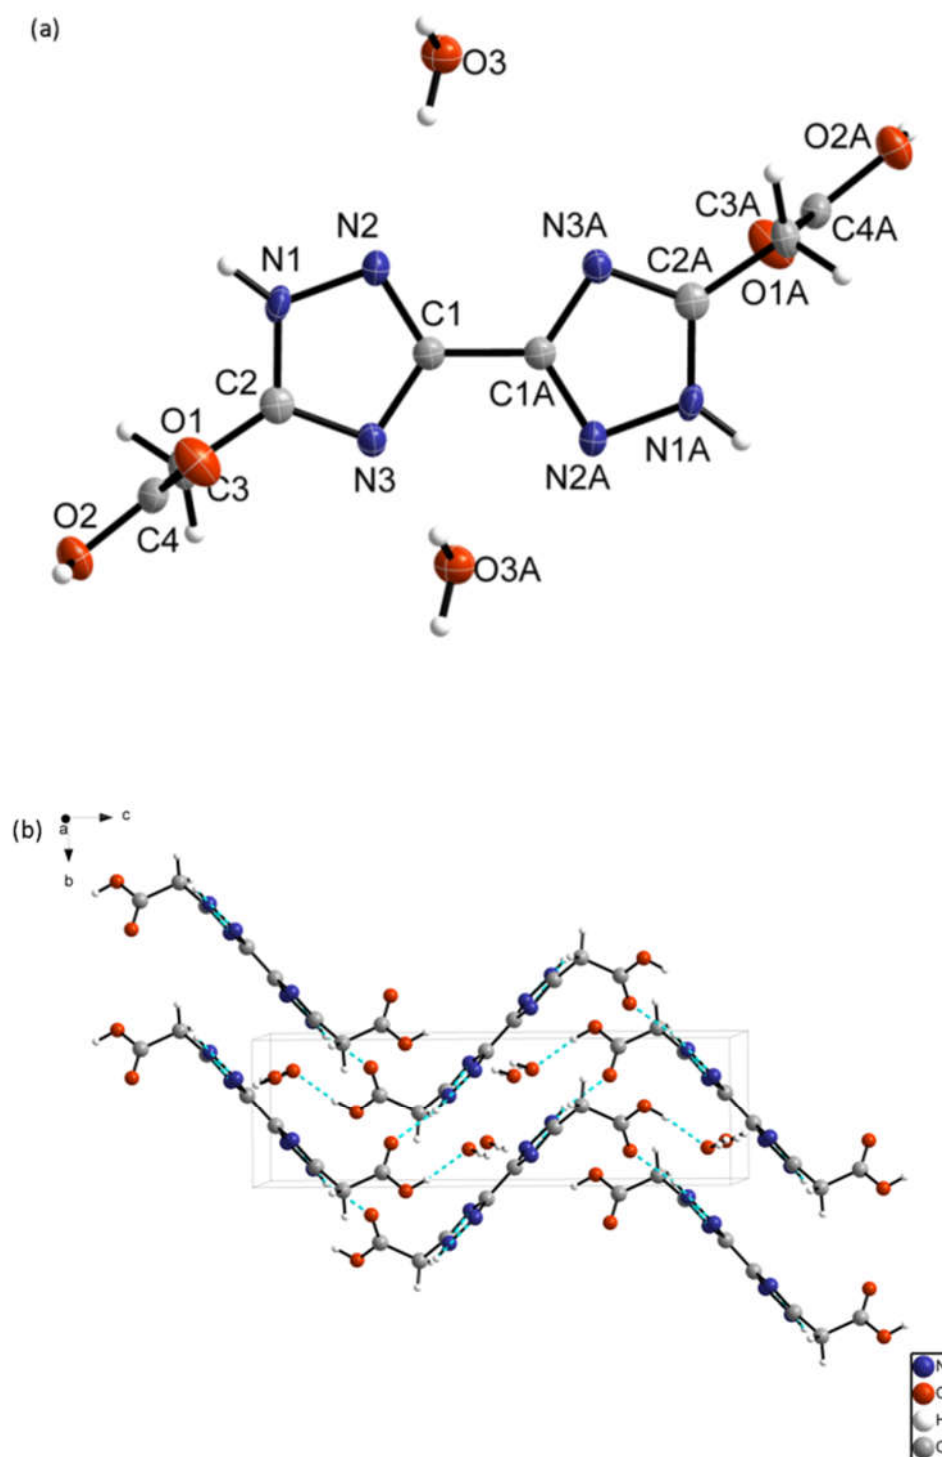

**Fig. S1** (a) Thermal ellipsoid plot (50%) and labelling scheme of  $4 \cdot 2\text{H}_2\text{O}$ . (b) Ball-and-stick packing diagram of  $4 \cdot 2\text{H}_2\text{O}$  viewed down the  $a$  axis. Dashed lines indicate strong hydrogen bonding.

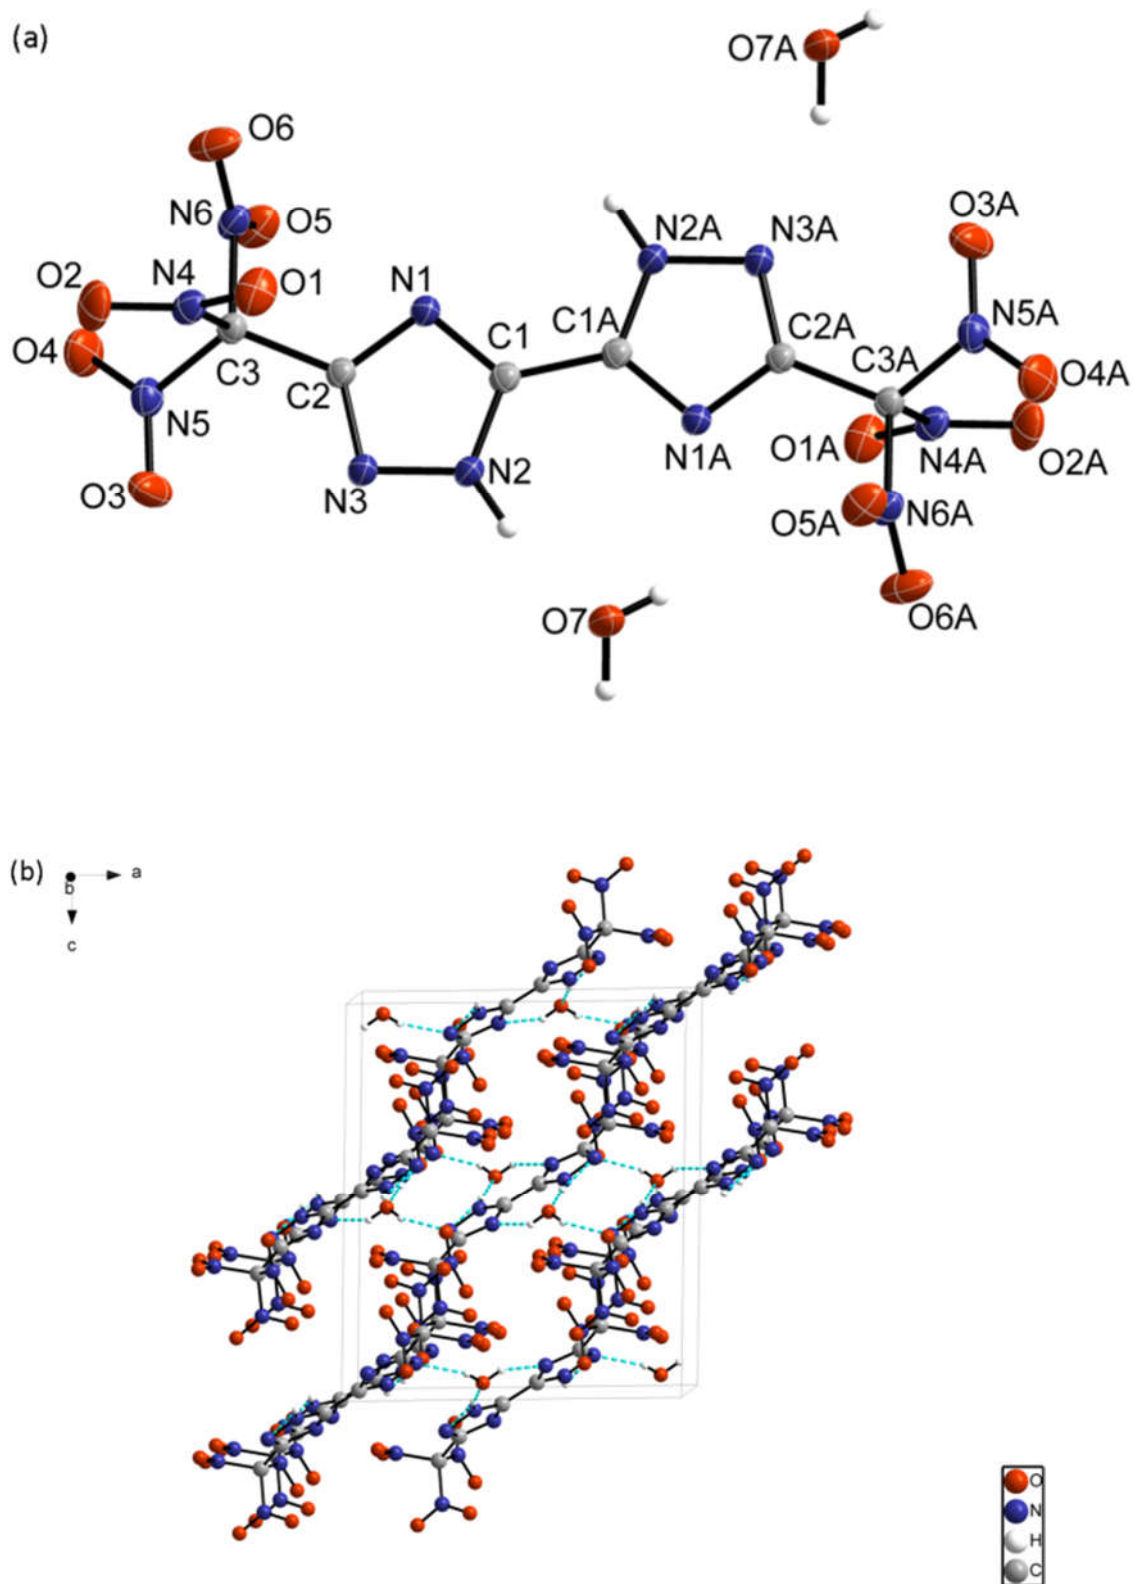

**Fig.S2** (a) Thermal ellipsoid plot (50%) and labelling scheme of  $5 \cdot 2\text{H}_2\text{O}$ . (b) Ball-and-stick packing diagram of  $5 \cdot 2\text{H}_2\text{O}$  viewed down the  $a$  axis. Dashed lines indicate strong hydrogen bonding.

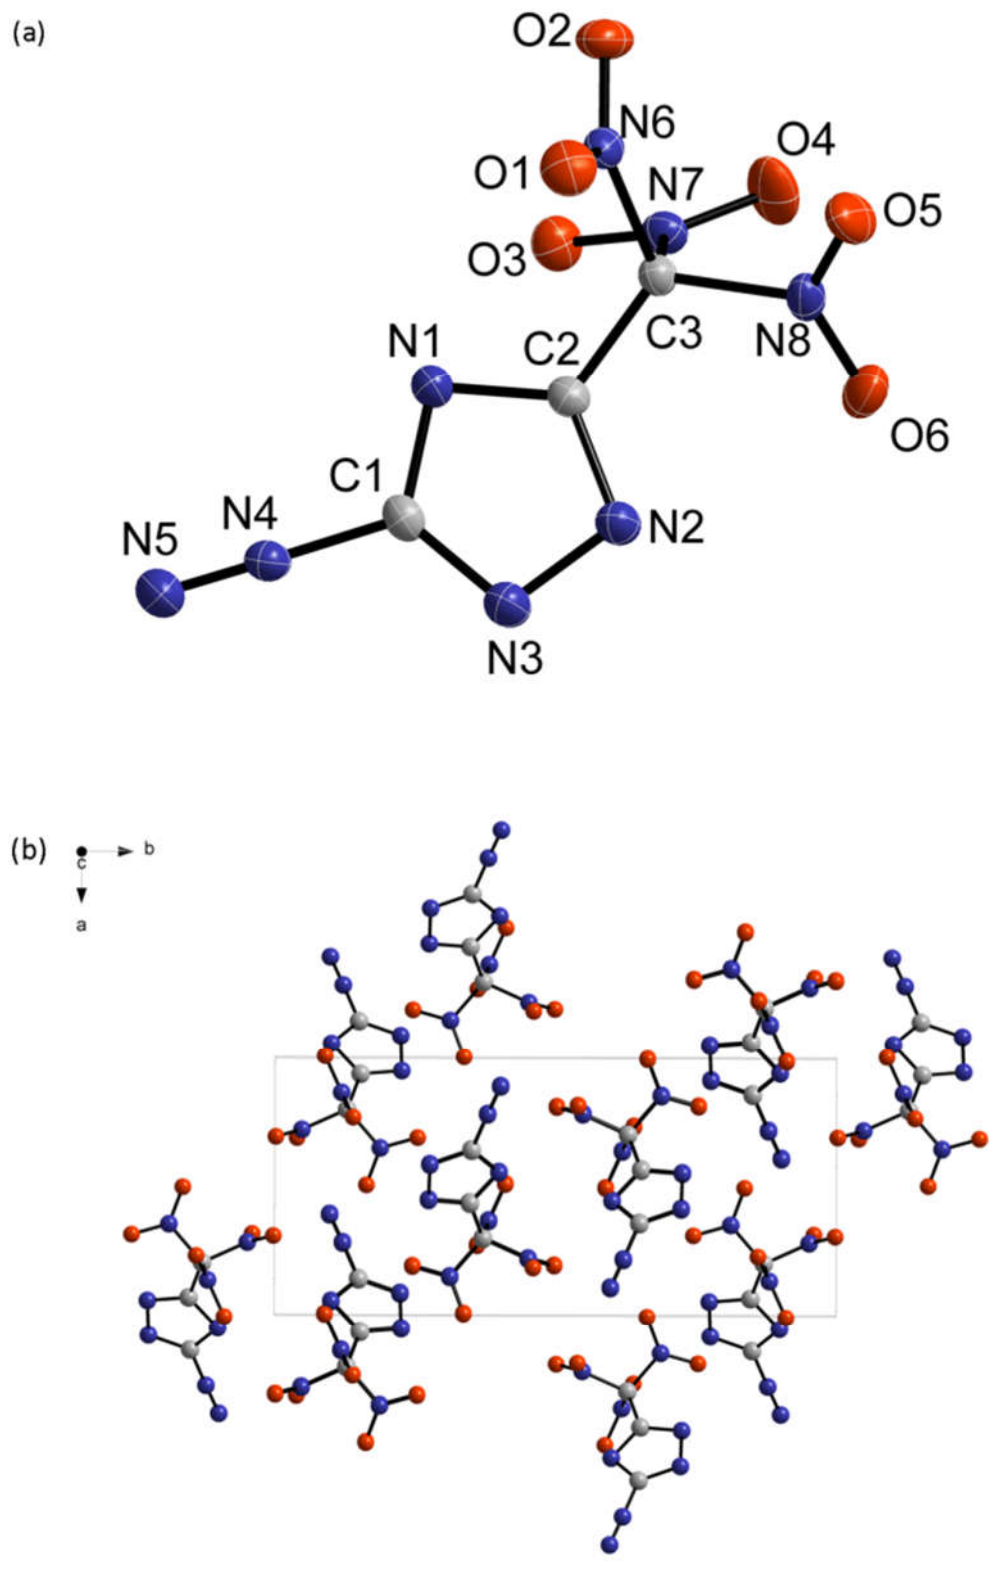

**Fig.S3** (a) Thermal ellipsoid plot (50%) and labelling scheme of **14**. (b) Ball-and-stick packing diagram of **14** viewed down the *a* axis.

**Table S1.** Crystal data and structure refinement details for **4·2H<sub>2</sub>O**, **5·2H<sub>2</sub>O** and **14**

|                                                            | <b>4·2H<sub>2</sub>O</b>                                         | <b>5·2H<sub>2</sub>O</b>                                         | <b>14(130K)</b>                                                  |
|------------------------------------------------------------|------------------------------------------------------------------|------------------------------------------------------------------|------------------------------------------------------------------|
| Formula                                                    | C <sub>8</sub> H <sub>12</sub> N <sub>6</sub> O <sub>6</sub>     | C <sub>6</sub> H <sub>6</sub> N <sub>12</sub> O <sub>14</sub>    | C <sub>3</sub> H <sub>8</sub> O <sub>6</sub>                     |
| Molecular weight [g mol <sup>-1</sup> ]                    | 288.24                                                           | 470.23                                                           | 244.11                                                           |
| T [K]                                                      | 133(2)                                                           | 130                                                              | 130                                                              |
| Crystal size [mm <sup>3</sup> ]                            | 0.14×0.10×0.05                                                   | 0.12×0.10×0.05                                                   | 0.15×0.12×0.10                                                   |
| Crystal system                                             | Monoclinic                                                       | Monoclinic                                                       | Orthorhombic                                                     |
| Space group                                                | <i>P</i> 2 <sub>1</sub> / <i>c</i>                               | <i>C</i> <sub>2</sub> / <i>c</i>                                 | <i>P</i> 2 <sub>1</sub> 2 <sub>1</sub>                           |
| <i>a</i> [Å]                                               | 6.9409(13)                                                       | 11.8413(13)                                                      | 7.7188(10)                                                       |
| <i>b</i> [Å]                                               | 5.1266(10)                                                       | 10.4440(11)                                                      | 16.867(2)                                                        |
| <i>c</i> [Å]                                               | 16.585(3)                                                        | 13.8220(14)                                                      | 6.4384(8)                                                        |
| $\alpha$ [°]                                               | 90                                                               | 90                                                               | 90                                                               |
| $\beta$ [°]                                                | 98.805(3)                                                        | 91.458(2)                                                        | 90                                                               |
| $\gamma$ [°]                                               | 90                                                               | 90                                                               | 90                                                               |
| <i>V</i> [Å <sup>3</sup> ]                                 | 583.18(19)                                                       | 591.1(3)                                                         | 838.24(19)                                                       |
| <i>Z</i>                                                   | 2                                                                | 4                                                                | 4                                                                |
| $\lambda$ [Å]                                              | 0.71073                                                          | 0.71073                                                          | 0.71073                                                          |
| $\rho_{\text{calc}}$ [g cm <sup>-3</sup> ]                 | 1.641                                                            | 1.828                                                            | 1.934                                                            |
| $\mu$ [mm <sup>-1</sup> ]                                  | 0.141                                                            | 0.179                                                            | 0.184                                                            |
| <i>F</i> (000)                                             | 300                                                              | 952                                                              | 488                                                              |
| $\vartheta$ range [°]                                      | 2.485-25.498                                                     | 2.601-30.740                                                     | 2.415-30.475                                                     |
| Reflections collected                                      | 3646 / 1082                                                      | 8561 / 2652                                                      | 8443 / 2549                                                      |
| Index ranges                                               | -8≤ <i>h</i> ≤7<br>-6≤ <i>k</i> ≤6<br>-20≤ <i>l</i> ≤19          | -16≤ <i>h</i> ≤15<br>-14≤ <i>k</i> ≤14<br>-16≤ <i>l</i> ≤19      | -10≤ <i>h</i> ≤11<br>-24≤ <i>k</i> ≤24<br>-9≤ <i>l</i> ≤7        |
| <i>R</i> <sub>int</sub>                                    | 0.0466                                                           | 0.0240                                                           | 0.0321                                                           |
| Data / restraints / parameters                             | 1082 / 2 / 105                                                   | 2652 / 0 / 157                                                   | 2549 / 0 / 154                                                   |
| Final <i>R</i> index [ <i>I</i> > 2 $\sigma$ ( <i>I</i> )] | <i>R</i> <sub>1</sub> =0.0396,<br><i>wR</i> <sub>2</sub> =0.0917 | <i>R</i> <sub>1</sub> =0.0359,<br><i>wR</i> <sub>2</sub> =0.0878 | <i>R</i> <sub>1</sub> =0.0341,<br><i>wR</i> <sub>2</sub> =0.0735 |
| Final <i>R</i> index [all data]                            | <i>R</i> <sub>1</sub> =0.0645,<br><i>wR</i> <sub>2</sub> =0.1004 | <i>R</i> <sub>1</sub> =0.0503,<br><i>wR</i> <sub>2</sub> =0.0953 | <i>R</i> <sub>1</sub> =0.0444,<br><i>wR</i> <sub>2</sub> =0.0776 |
| GOF on <i>F</i> <sup>2</sup>                               | 1.064                                                            | 1.015                                                            | 1.023                                                            |
| CCDC number                                                | 1524793                                                          | 1524802                                                          | 1524803                                                          |

**Table S2.** Atomic coordinates ( $\times 10^4$ ) and equivalent isotropic displacement parameters ( $\text{\AA}^2 \times 10^3$ ) for **4·2H<sub>2</sub>O**.  
 $U(\text{eq})$  is defined as one third of the trace of the orthogonalized  $U^{ij}$  tensor.

|      | x       | y       | z       | U(eq) |
|------|---------|---------|---------|-------|
| O(1) | 6459(1) | 4261(1) | 1983(1) | 31(1) |
| O(2) | 8039(1) | 3303(1) | 1668(1) | 34(1) |
| O(3) | 9189(1) | 4194(1) | 3600(1) | 39(1) |
| O(4) | 9127(1) | 2121(1) | 3439(1) | 37(1) |
| O(5) | 7056(1) | 1453(1) | 4165(1) | 30(1) |
| O(6) | 6446(1) | 1494(1) | 2668(1) | 36(1) |
| N(1) | 5809(1) | 3833(1) | 4281(1) | 18(1) |
| N(2) | 6284(1) | 5823(1) | 4611(1) | 19(1) |
| N(3) | 7134(1) | 5372(1) | 4081(1) | 20(1) |
| N(4) | 7304(1) | 3660(1) | 2198(1) | 21(1) |
| N(5) | 8712(1) | 3183(1) | 3474(1) | 24(1) |
| N(6) | 6933(1) | 1942(1) | 3373(1) | 22(1) |
| C(1) | 5511(1) | 4908(1) | 4727(1) | 17(1) |
| C(2) | 6808(1) | 4178(1) | 3909(1) | 16(1) |
| C(3) | 7433(1) | 3282(1) | 3278(1) | 17(1) |
| O(7) | 9061(1) | 6877(1) | 4638(1) | 29(1) |

**Table S3.** Bond lengths [ $\text{\AA}$ ] and angles [ $^\circ$ ] for **4·2H<sub>2</sub>O**.

|             |            |
|-------------|------------|
| O(1)-N(4)   | 1.2112(14) |
| O(2)-N(4)   | 1.2112(14) |
| O(3)-N(5)   | 1.2077(15) |
| O(4)-N(5)   | 1.2141(14) |
| O(5)-N(6)   | 1.2132(14) |
| O(6)-N(6)   | 1.2131(14) |
| N(1)-C(1)   | 1.3324(14) |
| N(1)-C(2)   | 1.3512(14) |
| N(2)-H(2)   | 0.90(2)    |
| N(2)-N(3)   | 1.3458(14) |
| N(2)-C(1)   | 1.3362(15) |
| N(3)-C(2)   | 1.3252(14) |
| N(4)-C(3)   | 1.5476(15) |
| N(5)-C(3)   | 1.5354(16) |
| N(6)-C(3)   | 1.5265(15) |
| C(1)-C(1)#1 | 1.455(2)   |
| C(2)-C(3)   | 1.4889(15) |
| O(7)-H(7A)  | 0.87(2)    |
| O(7)-H(7B)  | 0.79(3)    |



|                  |            |
|------------------|------------|
| C(1)-N(1)-C(2)   | 101.30(9)  |
| N(3)-N(2)-H(2)   | 122.9(13)  |
| C(1)-N(2)-H(2)   | 127.3(12)  |
| C(1)-N(2)-N(3)   | 109.81(9)  |
| C(2)-N(3)-N(2)   | 102.03(9)  |
| O(1)-N(4)-C(3)   | 115.45(9)  |
| O(2)-N(4)-O(1)   | 127.80(11) |
| O(2)-N(4)-C(3)   | 116.73(10) |
| O(3)-N(5)-O(4)   | 128.05(12) |
| O(3)-N(5)-C(3)   | 114.95(10) |
| O(4)-N(5)-C(3)   | 116.91(10) |
| O(5)-N(6)-O(6)   | 127.29(11) |
| O(5)-N(6)-C(3)   | 115.18(10) |
| O(6)-N(6)-C(3)   | 117.51(10) |
| N(1)-C(1)-N(2)   | 110.94(10) |
| N(1)-C(1)-C(1)#1 | 125.78(13) |
| N(2)-C(1)-C(1)#1 | 123.28(13) |
| N(1)-C(2)-C(3)   | 120.60(10) |
| N(3)-C(2)-N(1)   | 115.91(10) |
| N(3)-C(2)-C(3)   | 123.31(10) |
| N(5)-C(3)-N(4)   | 105.08(9)  |
| N(6)-C(3)-N(4)   | 106.75(8)  |
| N(6)-C(3)-N(5)   | 107.84(9)  |
| C(2)-C(3)-N(4)   | 111.43(9)  |
| C(2)-C(3)-N(5)   | 116.27(9)  |
| C(2)-C(3)-N(6)   | 109.00(9)  |
| H(7A)-O(7)-H(7B) | 113(2)     |

---

Symmetry transformations used to generate equivalent atoms:

#1 -x+1,-y+1,-z+1

**Table S4.** Anisotropic displacement parameters ( $\text{\AA}^2 \times 10^3$ ) for **4·2H<sub>2</sub>O**. The anisotropic displacement factor exponent takes the form:  $-2p^2 [ h^2 a^{*2} U^{11} + \dots + 2 h k a^* b^* U^{12} ]$ .

|      | U <sup>11</sup> | U <sup>22</sup> | U <sup>33</sup> | U <sup>23</sup> | U <sup>13</sup> | U <sup>12</sup> |
|------|-----------------|-----------------|-----------------|-----------------|-----------------|-----------------|
| O(1) | 36(1)           | 36(1)           | 22(1)           | 1(1)            | -4(1)           | 10(1)           |
| O(2) | 39(1)           | 39(1)           | 25(1)           | -2(1)           | 16(1)           | 4(1)            |
| O(3) | 22(1)           | 30(1)           | 66(1)           | -10(1)          | -2(1)           | -2(1)           |
| O(4) | 29(1)           | 27(1)           | 56(1)           | -1(1)           | 4(1)            | 12(1)           |
| O(5) | 45(1)           | 21(1)           | 25(1)           | 5(1)            | 3(1)            | 2(1)            |
| O(6) | 51(1)           | 30(1)           | 26(1)           | -6(1)           | 0(1)            | -15(1)          |
| N(1) | 19(1)           | 18(1)           | 18(1)           | -2(1)           | 3(1)            | -1(1)           |
| N(2) | 21(1)           | 17(1)           | 21(1)           | -4(1)           | 5(1)            | -2(1)           |

|      |       |       |       |        |       |       |
|------|-------|-------|-------|--------|-------|-------|
| N(3) | 20(1) | 18(1) | 21(1) | -3(1)  | 5(1)  | -1(1) |
| N(4) | 27(1) | 20(1) | 17(1) | -1(1)  | 4(1)  | -2(1) |
| N(5) | 21(1) | 25(1) | 26(1) | -1(1)  | 2(1)  | 4(1)  |
| N(6) | 27(1) | 17(1) | 21(1) | -3(1)  | 6(1)  | 0(1)  |
| C(1) | 19(1) | 18(1) | 14(1) | -1(1)  | 1(1)  | 0(1)  |
| C(2) | 18(1) | 16(1) | 14(1) | -1(1)  | 1(1)  | 0(1)  |
| C(3) | 18(1) | 16(1) | 16(1) | -1(1)  | 2(1)  | 0(1)  |
| O(7) | 30(1) | 23(1) | 36(1) | -10(1) | 10(1) | -8(1) |

**Table S5.** Hydrogen coordinates ( $\times 10^4$ ) and isotropic displacement parameters ( $\text{\AA}^2 \times 10^3$ ) for **4·2H<sub>2</sub>O**.

|       | x        | y        | z        | U(eq) |
|-------|----------|----------|----------|-------|
| H(2)  | 6265(16) | 6630(19) | 4836(14) | 41(5) |
| H(7A) | 8610(19) | 6300(20) | 4383(15) | 55(6) |
| H(7B) | 9590(20) | 7020(20) | 4325(19) | 76(8) |

**Table S6.** Torsion angles [ $^\circ$ ] for **4·2H<sub>2</sub>O**.

|                     |             |
|---------------------|-------------|
| O(1)-N(4)-C(3)-N(5) | -152.21(10) |
| O(1)-N(4)-C(3)-N(6) | 93.43(12)   |
| O(1)-N(4)-C(3)-C(2) | -25.48(14)  |
| O(2)-N(4)-C(3)-N(5) | 29.30(13)   |
| O(2)-N(4)-C(3)-N(6) | -85.06(12)  |
| O(2)-N(4)-C(3)-C(2) | 156.03(11)  |
| O(3)-N(5)-C(3)-N(4) | 79.55(12)   |
| O(3)-N(5)-C(3)-N(6) | -166.85(11) |
| O(3)-N(5)-C(3)-C(2) | -44.15(15)  |
| O(4)-N(5)-C(3)-N(4) | -97.24(12)  |
| O(4)-N(5)-C(3)-N(6) | 16.36(14)   |
| O(4)-N(5)-C(3)-C(2) | 139.07(11)  |
| O(5)-N(6)-C(3)-N(4) | 173.78(10)  |
| O(5)-N(6)-C(3)-N(5) | 61.30(12)   |
| O(5)-N(6)-C(3)-C(2) | -65.75(13)  |
| O(6)-N(6)-C(3)-N(4) | -7.38(14)   |
| O(6)-N(6)-C(3)-N(5) | -119.86(11) |
| O(6)-N(6)-C(3)-C(2) | 113.09(12)  |
| N(1)-C(2)-C(3)-N(4) | 103.24(12)  |
| N(1)-C(2)-C(3)-N(5) | -136.41(11) |
| N(1)-C(2)-C(3)-N(6) | -14.32(14)  |

|                       |             |
|-----------------------|-------------|
| N(2)-N(3)-C(2)-N(1)   | 0.54(13)    |
| N(2)-N(3)-C(2)-C(3)   | 175.54(10)  |
| N(3)-N(2)-C(1)-N(1)   | -0.37(13)   |
| N(3)-N(2)-C(1)-C(1)#1 | 179.67(13)  |
| N(3)-C(2)-C(3)-N(4)   | -71.53(14)  |
| N(3)-C(2)-C(3)-N(5)   | 48.82(15)   |
| N(3)-C(2)-C(3)-N(6)   | 170.91(10)  |
| C(1)-N(1)-C(2)-N(3)   | -0.75(13)   |
| C(1)-N(1)-C(2)-C(3)   | -175.89(10) |
| C(1)-N(2)-N(3)-C(2)   | -0.10(12)   |
| C(2)-N(1)-C(1)-N(2)   | 0.64(12)    |
| C(2)-N(1)-C(1)-C(1)#1 | -179.40(14) |

Symmetry transformations used to generate equivalent atoms:

#1 -x+1,-y+1,-z+1

**Table S7.** Hydrogen bonds for **4·2H<sub>2</sub>O** [Å and °].

| D-H...A            | d(D-H)  | d(H...A) | d(D...A)   | <(DHA)    |
|--------------------|---------|----------|------------|-----------|
| N(2)-H(2)...O(7)#2 | 0.90(2) | 1.77(2)  | 2.6520(14) | 167.8(19) |
| O(7)-H(7A)...N(3)  | 0.87(2) | 2.03(2)  | 2.8600(15) | 158(2)    |

Symmetry transformations used to generate equivalent atoms:

#1 -x+1,-y+1,-z+1    #2 -x+3/2,-y+3/2,-z+1

**Table S8.** Atomic coordinates ( $\times 10^4$ ) and equivalent isotropic displacement parameters ( $\text{Å}^2 \times 10^3$ ) for **5·2H<sub>2</sub>O**.

U(eq) is defined as one third of the trace of the orthogonalized  $U^{ij}$  tensor.

|      | x       | y       | z       | U(eq) |
|------|---------|---------|---------|-------|
| O(1) | 6459(1) | 4261(1) | 1983(1) | 31(1) |
| O(2) | 8039(1) | 3303(1) | 1668(1) | 34(1) |
| O(3) | 9189(1) | 4194(1) | 3600(1) | 39(1) |
| O(4) | 9127(1) | 2121(1) | 3439(1) | 37(1) |
| O(5) | 7056(1) | 1453(1) | 4165(1) | 30(1) |
| O(6) | 6446(1) | 1494(1) | 2668(1) | 36(1) |
| N(1) | 5809(1) | 3833(1) | 4281(1) | 18(1) |
| N(2) | 6284(1) | 5823(1) | 4611(1) | 19(1) |
| N(3) | 7134(1) | 5372(1) | 4081(1) | 20(1) |
| N(4) | 7304(1) | 3660(1) | 2198(1) | 21(1) |
| N(5) | 8712(1) | 3183(1) | 3474(1) | 24(1) |

|      |         |         |         |       |
|------|---------|---------|---------|-------|
| N(6) | 6933(1) | 1942(1) | 3373(1) | 22(1) |
| C(1) | 5511(1) | 4908(1) | 4727(1) | 17(1) |
| C(2) | 6808(1) | 4178(1) | 3909(1) | 16(1) |
| C(3) | 7433(1) | 3282(1) | 3278(1) | 17(1) |
| O(7) | 9061(1) | 6877(1) | 4638(1) | 29(1) |

---

**Table S9.** Bond lengths [Å] and angles [°] for 5·2H<sub>2</sub>O.

|                |            |
|----------------|------------|
| O(1)-N(4)      | 1.2112(14) |
| O(2)-N(4)      | 1.2112(14) |
| O(3)-N(5)      | 1.2077(15) |
| O(4)-N(5)      | 1.2141(14) |
| O(5)-N(6)      | 1.2132(14) |
| O(6)-N(6)      | 1.2131(14) |
| N(1)-C(1)      | 1.3324(14) |
| N(1)-C(2)      | 1.3512(14) |
| N(2)-H(2)      | 0.90(2)    |
| N(2)-N(3)      | 1.3458(14) |
| N(2)-C(1)      | 1.3362(15) |
| N(3)-C(2)      | 1.3252(14) |
| N(4)-C(3)      | 1.5476(15) |
| N(5)-C(3)      | 1.5354(16) |
| N(6)-C(3)      | 1.5265(15) |
| C(1)-C(1)#1    | 1.455(2)   |
| C(2)-C(3)      | 1.4889(15) |
| O(7)-H(7A)     | 0.87(2)    |
| O(7)-H(7B)     | 0.79(3)    |
| C(1)-N(1)-C(2) | 101.30(9)  |
| N(3)-N(2)-H(2) | 122.9(13)  |
| C(1)-N(2)-H(2) | 127.3(12)  |
| C(1)-N(2)-N(3) | 109.81(9)  |
| C(2)-N(3)-N(2) | 102.03(9)  |
| O(1)-N(4)-C(3) | 115.45(9)  |
| O(2)-N(4)-O(1) | 127.80(11) |
| O(2)-N(4)-C(3) | 116.73(10) |
| O(3)-N(5)-O(4) | 128.05(12) |
| O(3)-N(5)-C(3) | 114.95(10) |
| O(4)-N(5)-C(3) | 116.91(10) |
| O(5)-N(6)-O(6) | 127.29(11) |
| O(5)-N(6)-C(3) | 115.18(10) |
| O(6)-N(6)-C(3) | 117.51(10) |
| N(1)-C(1)-N(2) | 110.94(10) |

|                  |            |
|------------------|------------|
| N(1)-C(1)-C(1)#1 | 125.78(13) |
| N(2)-C(1)-C(1)#1 | 123.28(13) |
| N(1)-C(2)-C(3)   | 120.60(10) |
| N(3)-C(2)-N(1)   | 115.91(10) |
| N(3)-C(2)-C(3)   | 123.31(10) |
| N(5)-C(3)-N(4)   | 105.08(9)  |
| N(6)-C(3)-N(4)   | 106.75(8)  |
| N(6)-C(3)-N(5)   | 107.84(9)  |
| C(2)-C(3)-N(4)   | 111.43(9)  |
| C(2)-C(3)-N(5)   | 116.27(9)  |
| C(2)-C(3)-N(6)   | 109.00(9)  |
| H(7A)-O(7)-H(7B) | 113(2)     |

Symmetry transformations used to generate equivalent atoms:

#1 -x+1,-y+1,-z+1

**Table S10.** Anisotropic displacement parameters ( $\text{\AA}^2 \times 10^3$ ) for **5·2H<sub>2</sub>O**. The anisotropic displacement factor exponent takes the form:  $-2p^2 [ h^2 a^{*2} U^{11} + \dots + 2 h k a^* b^* U^{12} ]$

|      | U <sup>11</sup> | U <sup>22</sup> | U <sup>33</sup> | U <sup>23</sup> | U <sup>13</sup> | U <sup>12</sup> |
|------|-----------------|-----------------|-----------------|-----------------|-----------------|-----------------|
| O(1) | 36(1)           | 36(1)           | 22(1)           | 1(1)            | -4(1)           | 10(1)           |
| O(2) | 39(1)           | 39(1)           | 25(1)           | -2(1)           | 16(1)           | 4(1)            |
| O(3) | 22(1)           | 30(1)           | 66(1)           | -10(1)          | -2(1)           | -2(1)           |
| O(4) | 29(1)           | 27(1)           | 56(1)           | -1(1)           | 4(1)            | 12(1)           |
| O(5) | 45(1)           | 21(1)           | 25(1)           | 5(1)            | 3(1)            | 2(1)            |
| O(6) | 51(1)           | 30(1)           | 26(1)           | -6(1)           | 0(1)            | -15(1)          |
| N(1) | 19(1)           | 18(1)           | 18(1)           | -2(1)           | 3(1)            | -1(1)           |
| N(2) | 21(1)           | 17(1)           | 21(1)           | -4(1)           | 5(1)            | -2(1)           |
| N(3) | 20(1)           | 18(1)           | 21(1)           | -3(1)           | 5(1)            | -1(1)           |
| N(4) | 27(1)           | 20(1)           | 17(1)           | -1(1)           | 4(1)            | -2(1)           |
| N(5) | 21(1)           | 25(1)           | 26(1)           | -1(1)           | 2(1)            | 4(1)            |
| N(6) | 27(1)           | 17(1)           | 21(1)           | -3(1)           | 6(1)            | 0(1)            |
| C(1) | 19(1)           | 18(1)           | 14(1)           | -1(1)           | 1(1)            | 0(1)            |
| C(2) | 18(1)           | 16(1)           | 14(1)           | -1(1)           | 1(1)            | 0(1)            |
| C(3) | 18(1)           | 16(1)           | 16(1)           | -1(1)           | 2(1)            | 0(1)            |
| O(7) | 30(1)           | 23(1)           | 36(1)           | -10(1)          | 10(1)           | -8(1)           |

**Table S11.** Hydrogen coordinates ( $\times 10^4$ ) and isotropic displacement parameters ( $\text{\AA}^2 \times 10^3$ ) for **5·2H<sub>2</sub>O**.

|  | x | y | z | U(eq) |
|--|---|---|---|-------|
|--|---|---|---|-------|

---

|       |          |          |          |       |
|-------|----------|----------|----------|-------|
| H(2)  | 6265(16) | 6630(19) | 4836(14) | 41(5) |
| H(7A) | 8610(19) | 6300(20) | 4383(15) | 55(6) |
| H(7B) | 9590(20) | 7020(20) | 4325(19) | 76(8) |

---

**Table S12.** Torsion angles [°] for **5·2H<sub>2</sub>O**.

---

|                       |             |
|-----------------------|-------------|
| O(1)-N(4)-C(3)-N(5)   | -152.21(10) |
| O(1)-N(4)-C(3)-N(6)   | 93.43(12)   |
| O(1)-N(4)-C(3)-C(2)   | -25.48(14)  |
| O(2)-N(4)-C(3)-N(5)   | 29.30(13)   |
| O(2)-N(4)-C(3)-N(6)   | -85.06(12)  |
| O(2)-N(4)-C(3)-C(2)   | 156.03(11)  |
| O(3)-N(5)-C(3)-N(4)   | 79.55(12)   |
| O(3)-N(5)-C(3)-N(6)   | -166.85(11) |
| O(3)-N(5)-C(3)-C(2)   | -44.15(15)  |
| O(4)-N(5)-C(3)-N(4)   | -97.24(12)  |
| O(4)-N(5)-C(3)-N(6)   | 16.36(14)   |
| O(4)-N(5)-C(3)-C(2)   | 139.07(11)  |
| O(5)-N(6)-C(3)-N(4)   | 173.78(10)  |
| O(5)-N(6)-C(3)-N(5)   | 61.30(12)   |
| O(5)-N(6)-C(3)-C(2)   | -65.75(13)  |
| O(6)-N(6)-C(3)-N(4)   | -7.38(14)   |
| O(6)-N(6)-C(3)-N(5)   | -119.86(11) |
| O(6)-N(6)-C(3)-C(2)   | 113.09(12)  |
| N(1)-C(2)-C(3)-N(4)   | 103.24(12)  |
| N(1)-C(2)-C(3)-N(5)   | -136.41(11) |
| N(1)-C(2)-C(3)-N(6)   | -14.32(14)  |
| N(2)-N(3)-C(2)-N(1)   | 0.54(13)    |
| N(2)-N(3)-C(2)-C(3)   | 175.54(10)  |
| N(3)-N(2)-C(1)-N(1)   | -0.37(13)   |
| N(3)-N(2)-C(1)-C(1)#1 | 179.67(13)  |
| N(3)-C(2)-C(3)-N(4)   | -71.53(14)  |
| N(3)-C(2)-C(3)-N(5)   | 48.82(15)   |
| N(3)-C(2)-C(3)-N(6)   | 170.91(10)  |
| C(1)-N(1)-C(2)-N(3)   | -0.75(13)   |
| C(1)-N(1)-C(2)-C(3)   | -175.89(10) |
| C(1)-N(2)-N(3)-C(2)   | -0.10(12)   |
| C(2)-N(1)-C(1)-N(2)   | 0.64(12)    |
| C(2)-N(1)-C(1)-C(1)#1 | -179.40(14) |

---

Symmetry transformations used to generate equivalent atoms:

#1 -x+1,-y+1,-z+1

**Table S13.** Hydrogen bonds for **5·2H<sub>2</sub>O** [Å and °].

| D-H...A            | d(D-H)  | d(H...A) | d(D...A)   | <(DHA)    |
|--------------------|---------|----------|------------|-----------|
| N(2)-H(2)...O(7)#2 | 0.90(2) | 1.77(2)  | 2.6520(14) | 167.8(19) |
| O(7)-H(7A)...N(3)  | 0.87(2) | 2.03(2)  | 2.8600(15) | 158(2)    |

Symmetry transformations used to generate equivalent atoms:

#1 -x+1,-y+1,-z+1      #2 -x+3/2,-y+3/2,-z+1

**Table S14.** Atomic coordinates ( $\times 10^4$ ) and equivalent isotropic displacement parameters ( $\text{Å}^2 \times 10^3$ ) for **14**.

U(eq) is defined as one third of the trace of the orthogonalized  $U^{ij}$  tensor.

|      | x       | y       | z        | U(eq) |
|------|---------|---------|----------|-------|
| O(1) | 1863(2) | 5397(1) | 8606(2)  | 29(1) |
| O(2) | 1924(2) | 5021(1) | 5365(3)  | 29(1) |
| O(3) | 5074(2) | 5894(1) | 3794(2)  | 26(1) |
| O(4) | 2691(3) | 6394(1) | 2560(2)  | 36(1) |
| O(5) | 47(2)   | 6634(1) | 6525(3)  | 33(1) |
| O(6) | 1890(2) | 7544(1) | 5566(2)  | 30(1) |
| N(1) | 5552(2) | 6007(1) | 8292(3)  | 20(1) |
| N(2) | 4477(2) | 7258(1) | 8513(3)  | 22(1) |
| N(3) | 5855(2) | 7237(1) | 9783(3)  | 24(1) |
| N(4) | 7816(2) | 6212(1) | 10697(3) | 21(1) |
| N(5) | 8906(2) | 5981(1) | 11602(3) | 29(1) |
| N(6) | 2190(2) | 5484(1) | 6772(3)  | 20(1) |
| N(7) | 3646(2) | 6189(1) | 3947(3)  | 21(1) |
| N(8) | 1483(2) | 6879(1) | 6092(3)  | 22(1) |
| C(1) | 6415(3) | 6495(1) | 9559(3)  | 19(1) |
| C(2) | 4352(3) | 6524(1) | 7685(3)  | 17(1) |
| C(3) | 2979(2) | 6288(1) | 6187(3)  | 17(1) |

**Table S15.** Bond lengths [Å] and angles [°] for **14**.

|           |          |
|-----------|----------|
| O(1)-N(6) | 1.216(2) |
| O(2)-N(6) | 1.213(2) |

|                |            |
|----------------|------------|
| O(3)-N(7)      | 1.215(2)   |
| O(4)-N(7)      | 1.208(2)   |
| O(5)-N(8)      | 1.215(2)   |
| O(6)-N(8)      | 1.213(2)   |
| N(1)-C(1)      | 1.336(3)   |
| N(1)-C(2)      | 1.331(3)   |
| N(2)-N(3)      | 1.342(3)   |
| N(2)-C(2)      | 1.352(3)   |
| N(3)-C(1)      | 1.333(3)   |
| N(4)-N(5)      | 1.095(2)   |
| N(4)-C(1)      | 1.390(3)   |
| N(6)-C(3)      | 1.534(2)   |
| N(7)-C(3)      | 1.540(3)   |
| N(8)-C(3)      | 1.527(2)   |
| C(2)-C(3)      | 1.488(3)   |
|                |            |
| C(2)-N(1)-C(1) | 97.07(17)  |
| N(3)-N(2)-C(2) | 105.79(17) |
| C(1)-N(3)-N(2) | 102.49(17) |
| N(5)-N(4)-C(1) | 179.1(2)   |
| O(1)-N(6)-C(3) | 115.28(16) |
| O(2)-N(6)-O(1) | 127.74(18) |
| O(2)-N(6)-C(3) | 116.95(16) |
| O(3)-N(7)-C(3) | 115.07(16) |
| O(4)-N(7)-O(3) | 127.69(19) |
| O(4)-N(7)-C(3) | 117.22(17) |
| O(5)-N(8)-C(3) | 117.29(17) |
| O(6)-N(8)-O(5) | 127.97(18) |
| O(6)-N(8)-C(3) | 114.74(16) |
| N(1)-C(1)-N(4) | 119.88(19) |
| N(3)-C(1)-N(1) | 118.85(19) |
| N(3)-C(1)-N(4) | 121.18(19) |
| N(1)-C(2)-N(2) | 115.79(18) |
| N(1)-C(2)-C(3) | 120.72(18) |
| N(2)-C(2)-C(3) | 123.49(18) |
| N(6)-C(3)-N(7) | 105.47(14) |
| N(8)-C(3)-N(6) | 106.66(14) |
| N(8)-C(3)-N(7) | 106.61(15) |
| C(2)-C(3)-N(6) | 111.13(15) |
| C(2)-C(3)-N(7) | 113.46(16) |
| C(2)-C(3)-N(8) | 112.97(16) |

---

**Table S16.** Anisotropic displacement parameters ( $\text{\AA}^2 \times 10^3$ ) for **14**. The anisotropic



displacement factor exponent takes the form:  $-2p^2[h^2 a^2 U^{11} + \dots + 2 h k a^* b^* U^{12}]$

|      | U <sup>11</sup> | U <sup>22</sup> | U <sup>33</sup> | U <sup>23</sup> | U <sup>13</sup> | U <sup>12</sup> |
|------|-----------------|-----------------|-----------------|-----------------|-----------------|-----------------|
| O(1) | 27(1)           | 31(1)           | 28(1)           | 5(1)            | 6(1)            | -4(1)           |
| O(2) | 26(1)           | 24(1)           | 38(1)           | -9(1)           | -1(1)           | -5(1)           |
| O(3) | 23(1)           | 31(1)           | 24(1)           | -2(1)           | 5(1)            | 3(1)            |
| O(4) | 40(1)           | 50(1)           | 20(1)           | -3(1)           | -9(1)           | 11(1)           |
| O(5) | 16(1)           | 33(1)           | 50(1)           | -8(1)           | -3(1)           | 2(1)            |
| O(6) | 36(1)           | 21(1)           | 31(1)           | 3(1)            | -4(1)           | 6(1)            |
| N(1) | 19(1)           | 21(1)           | 21(1)           | -1(1)           | -3(1)           | 1(1)            |
| N(2) | 21(1)           | 22(1)           | 23(1)           | -4(1)           | -2(1)           | 1(1)            |
| N(3) | 23(1)           | 24(1)           | 26(1)           | -3(1)           | -4(1)           | 0(1)            |
| N(4) | 21(1)           | 20(1)           | 23(1)           | -2(1)           | -2(1)           | -2(1)           |
| N(5) | 26(1)           | 28(1)           | 35(1)           | -1(1)           | -8(1)           | -1(1)           |
| N(6) | 14(1)           | 18(1)           | 28(1)           | 0(1)            | -1(1)           | 0(1)            |
| N(7) | 23(1)           | 21(1)           | 18(1)           | -2(1)           | -2(1)           | -1(1)           |
| N(8) | 21(1)           | 22(1)           | 23(1)           | -4(1)           | -4(1)           | 7(1)            |
| C(1) | 16(1)           | 25(1)           | 18(1)           | 1(1)            | -1(1)           | 0(1)            |
| C(2) | 15(1)           | 19(1)           | 15(1)           | 1(1)            | 2(1)            | -2(1)           |
| C(3) | 15(1)           | 18(1)           | 18(1)           | 0(1)            | 0(1)            | 1(1)            |

**Table S17.** Torsion angles [°] for **14**.

|                     |             |
|---------------------|-------------|
| O(1)-N(6)-C(3)-N(7) | 167.67(16)  |
| O(1)-N(6)-C(3)-N(8) | -79.2(2)    |
| O(1)-N(6)-C(3)-C(2) | 44.3(2)     |
| O(2)-N(6)-C(3)-N(7) | -14.2(2)    |
| O(2)-N(6)-C(3)-N(8) | 98.90(19)   |
| O(2)-N(6)-C(3)-C(2) | -137.57(18) |
| O(3)-N(7)-C(3)-N(6) | -83.68(19)  |
| O(3)-N(7)-C(3)-N(8) | 163.18(16)  |
| O(3)-N(7)-C(3)-C(2) | 38.2(2)     |
| O(4)-N(7)-C(3)-N(6) | 94.7(2)     |
| O(4)-N(7)-C(3)-N(8) | -18.5(2)    |
| O(4)-N(7)-C(3)-C(2) | -143.46(19) |
| O(5)-N(8)-C(3)-N(6) | 2.0(2)      |
| O(5)-N(8)-C(3)-N(7) | 114.35(19)  |
| O(5)-N(8)-C(3)-C(2) | -120.4(2)   |
| O(6)-N(8)-C(3)-N(6) | -177.34(16) |
| O(6)-N(8)-C(3)-N(7) | -65.0(2)    |
| O(6)-N(8)-C(3)-C(2) | 60.3(2)     |

|                     |             |
|---------------------|-------------|
| N(1)-C(2)-C(3)-N(6) | 45.8(2)     |
| N(1)-C(2)-C(3)-N(7) | -72.9(2)    |
| N(1)-C(2)-C(3)-N(8) | 165.62(18)  |
| N(2)-N(3)-C(1)-N(1) | -0.8(3)     |
| N(2)-N(3)-C(1)-N(4) | -177.40(18) |
| N(2)-C(2)-C(3)-N(6) | -134.25(19) |
| N(2)-C(2)-C(3)-N(7) | 107.1(2)    |
| N(2)-C(2)-C(3)-N(8) | -14.4(3)    |
| N(3)-N(2)-C(2)-N(1) | -0.4(2)     |
| N(3)-N(2)-C(2)-C(3) | 179.63(18)  |
| C(1)-N(1)-C(2)-N(2) | -0.1(2)     |
| C(1)-N(1)-C(2)-C(3) | 179.92(18)  |
| C(2)-N(1)-C(1)-N(3) | 0.5(2)      |
| C(2)-N(1)-C(1)-N(4) | 177.19(19)  |
| C(2)-N(2)-N(3)-C(1) | 0.6(2)      |

---

### DSC plots for the title compounds

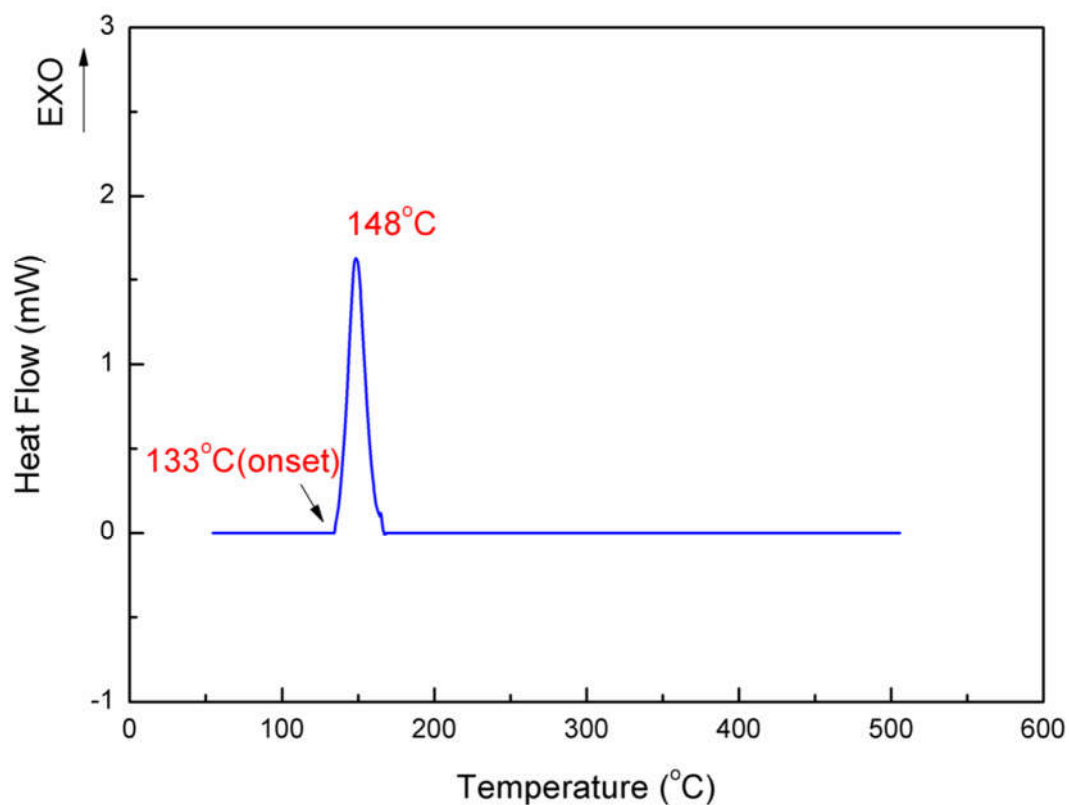

Fig.S4 DSC plot for compound 5

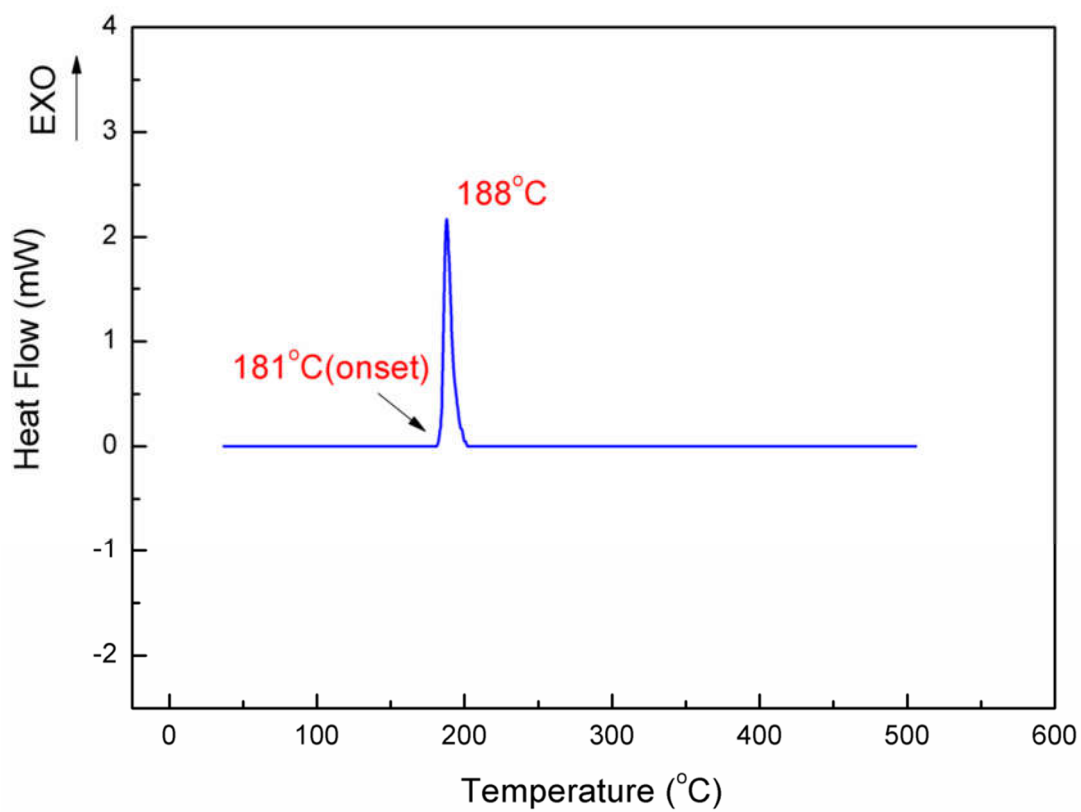

Fig.S5 DSC plot for compound 6

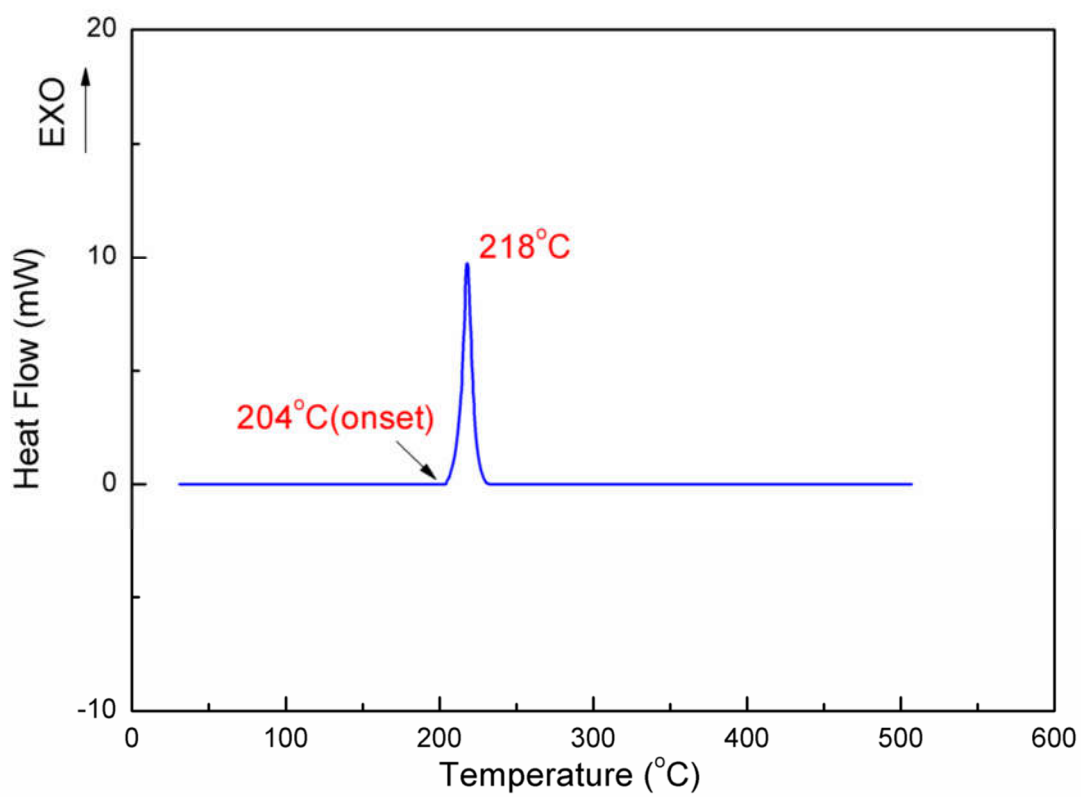

Fig.S6 DSC plot for compound 7

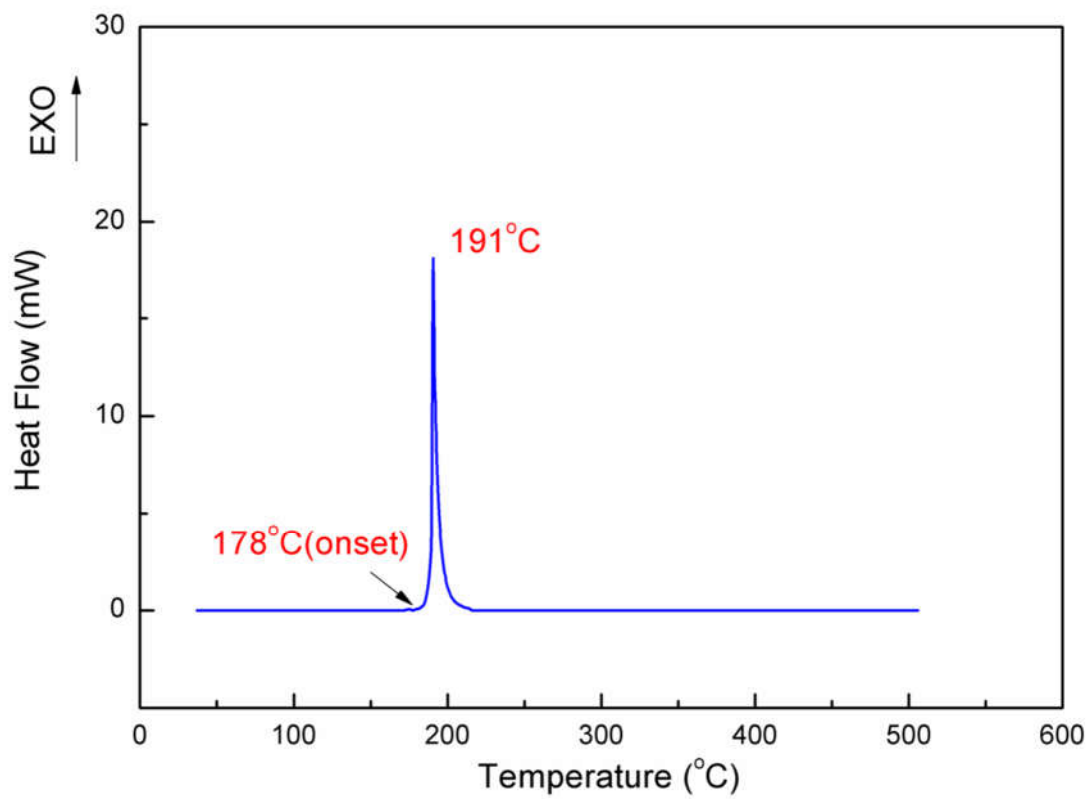

Fig.S7 DSC plot for compound 8

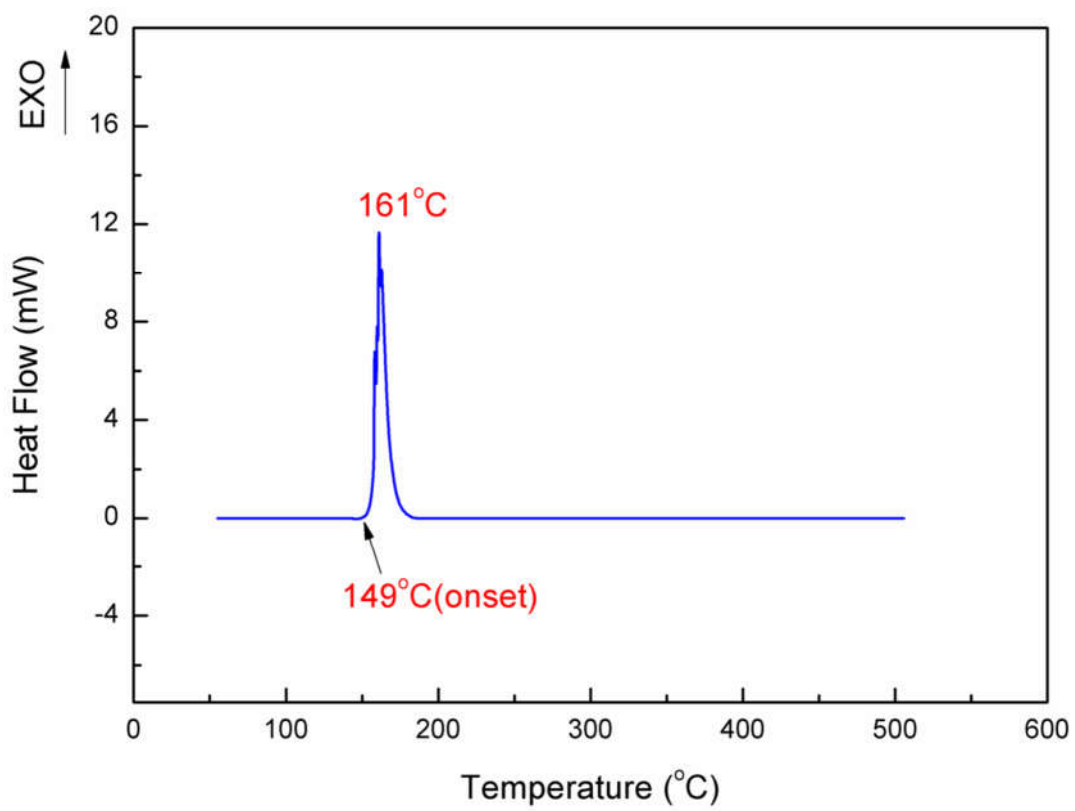

Fig.S8 DSC plot for compound 9

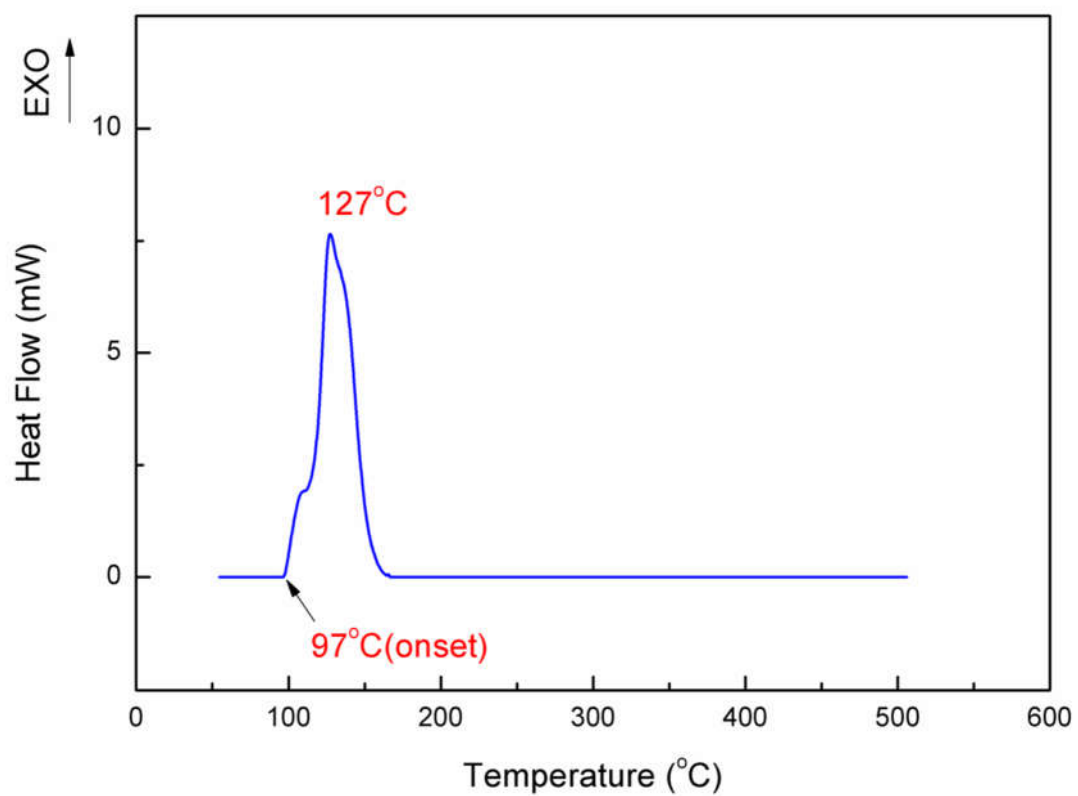

Fig.S9 DSC plot for compound 14

### $^1\text{H}$ and $^{13}\text{C}$ NMR for the target compounds

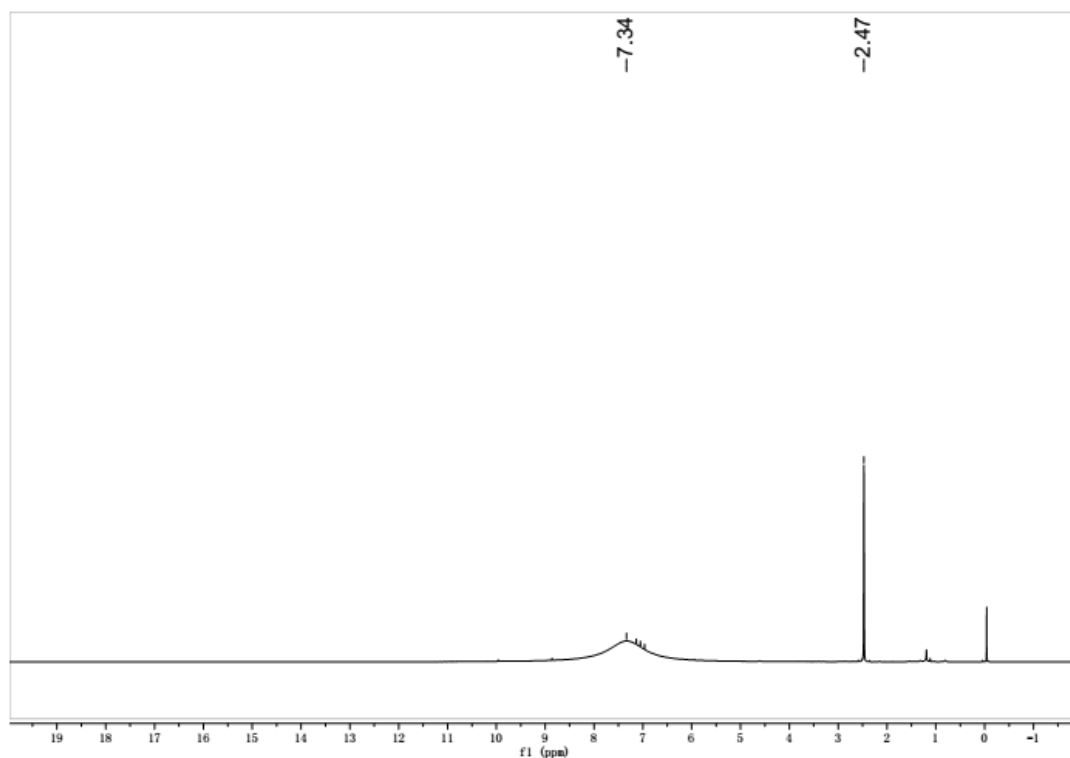

Fig.S10  $^1\text{H}$  NMR for compound 5

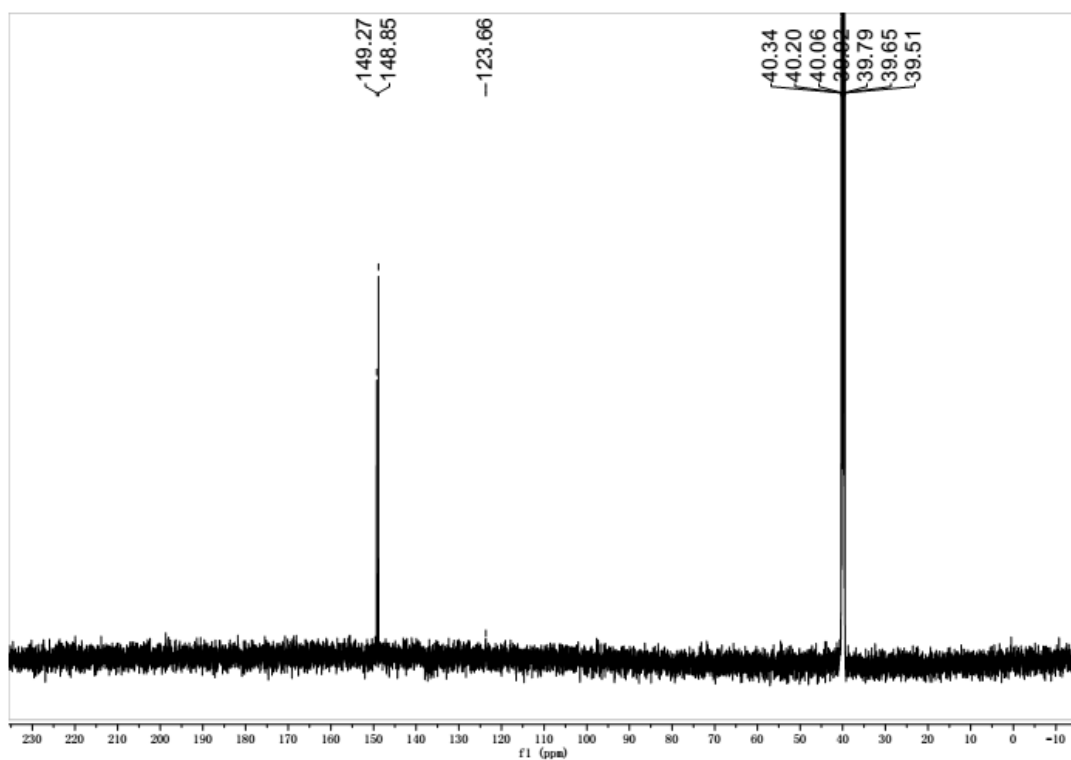

Fig.S11  $^{13}\text{C}$  NMR for compound 5

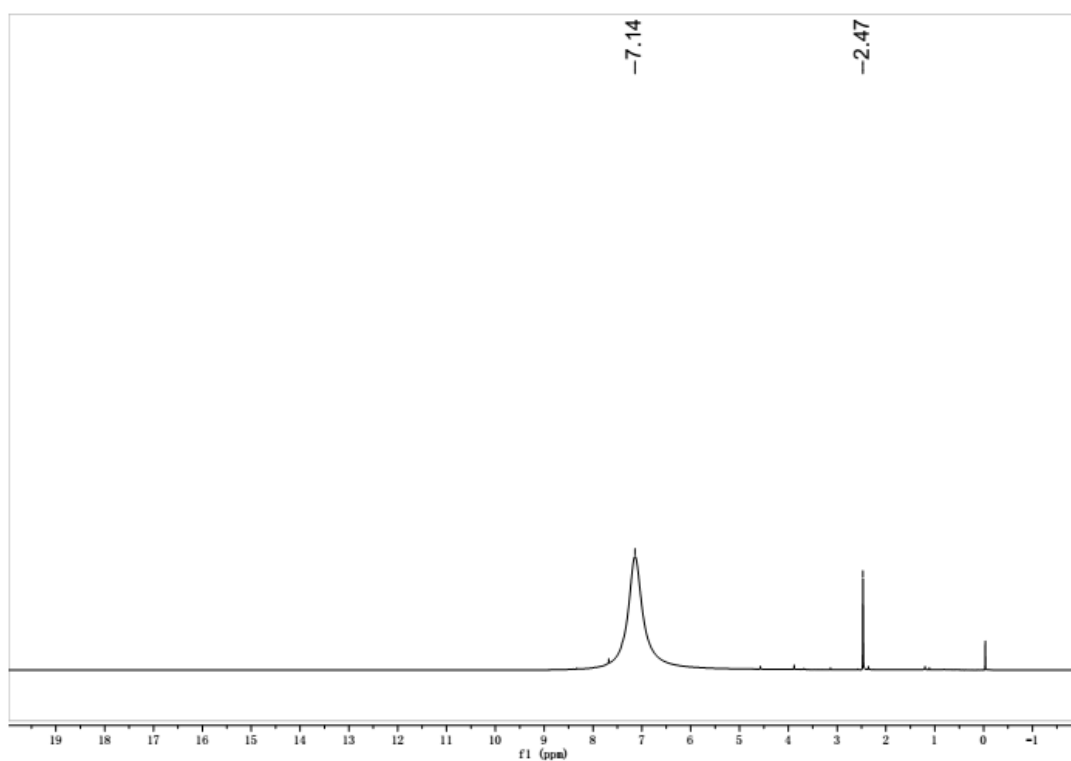

Fig.S12  $^1\text{H}$  NMR for compound 6

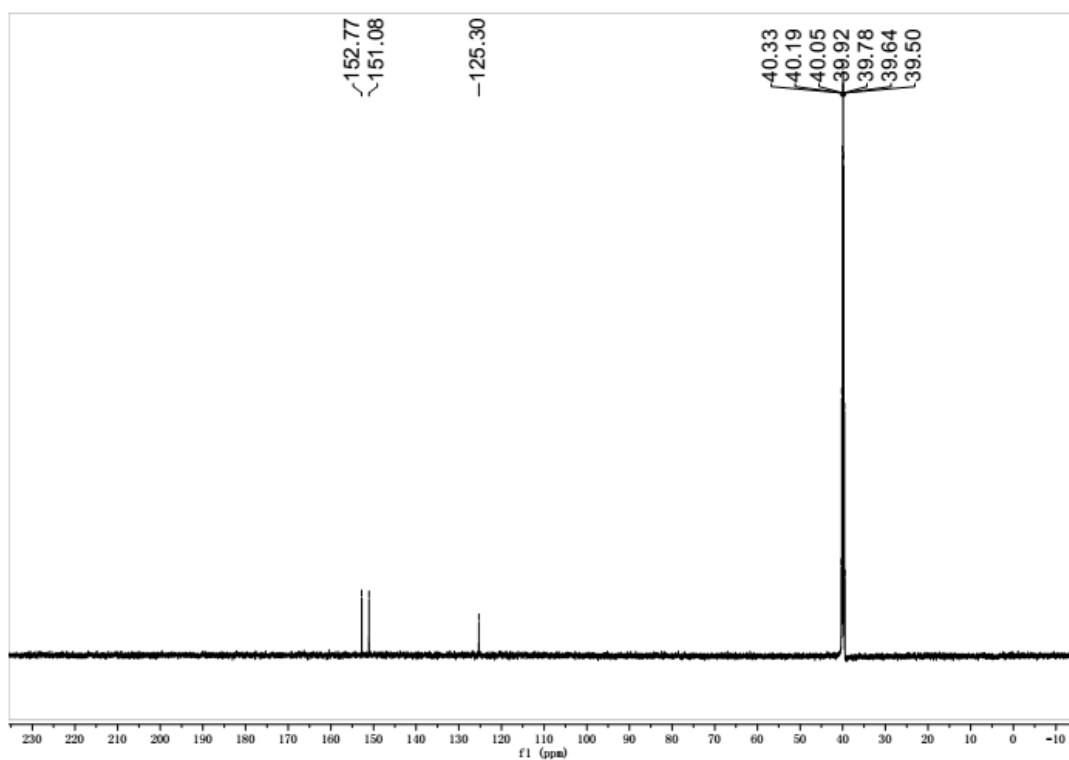

Fig.S13  $^{13}\text{C}$  NMR for compound 6

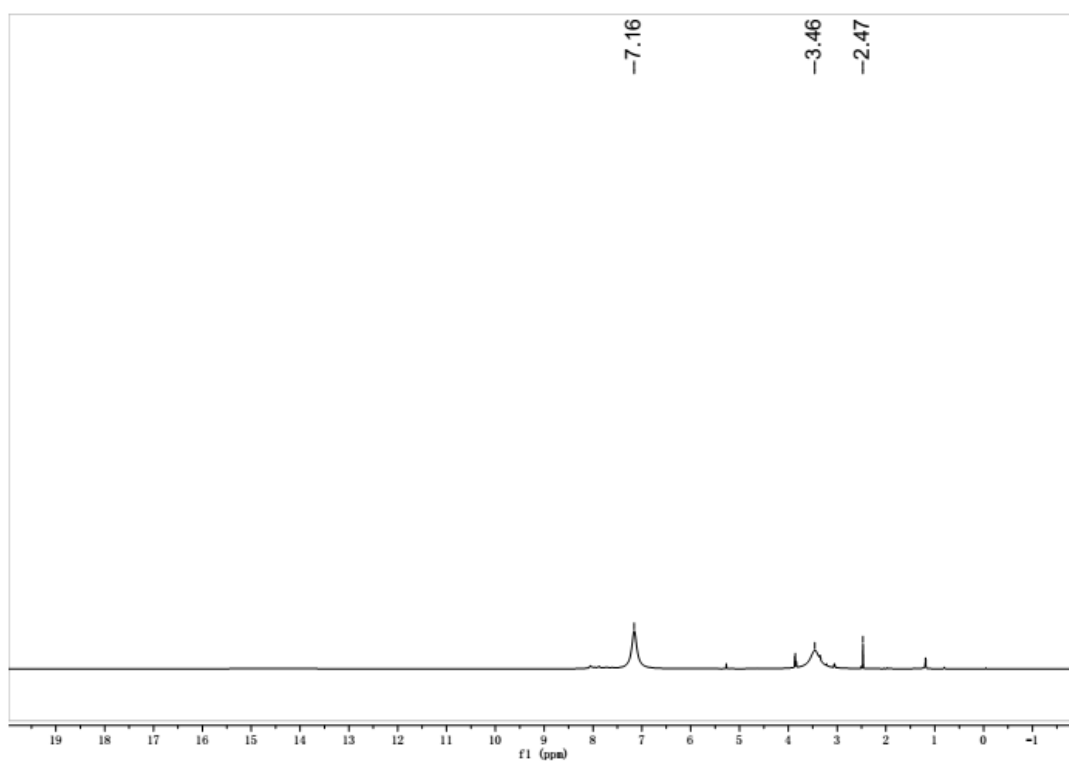

Fig.S14  $^1\text{H}$  NMR for compound 7

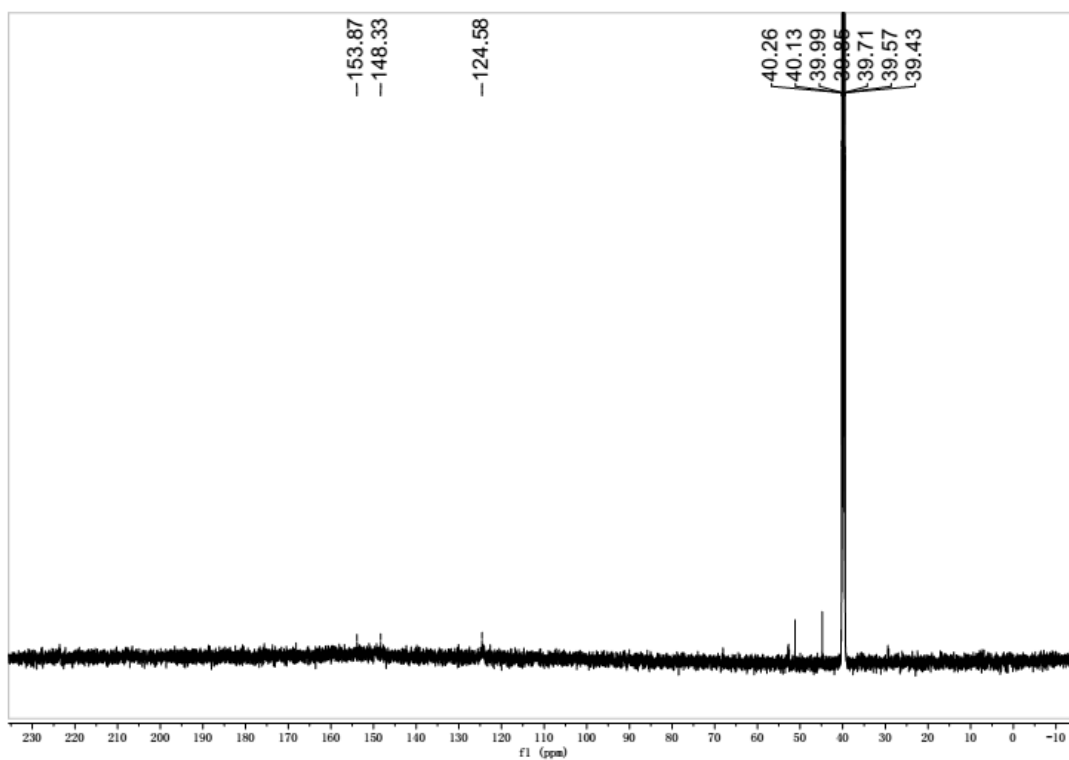

Fig.S15  $^{13}\text{C}$  NMR for compound 7

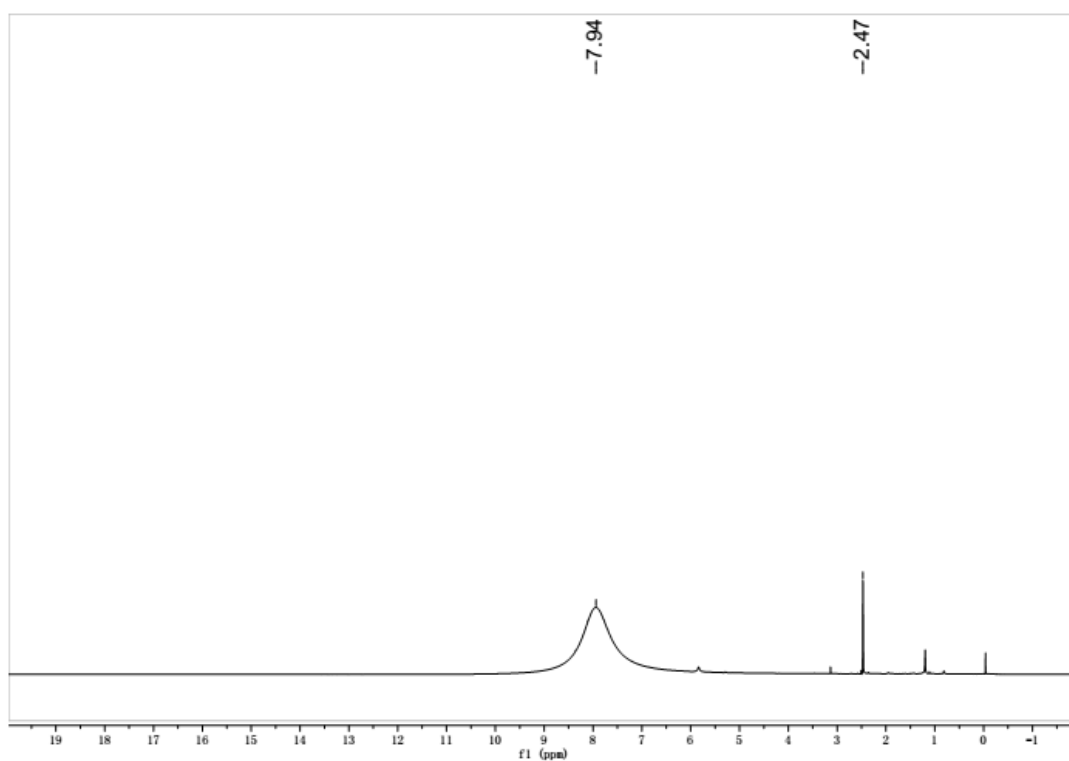

Fig.S16  $^1\text{H}$  NMR for compound 8



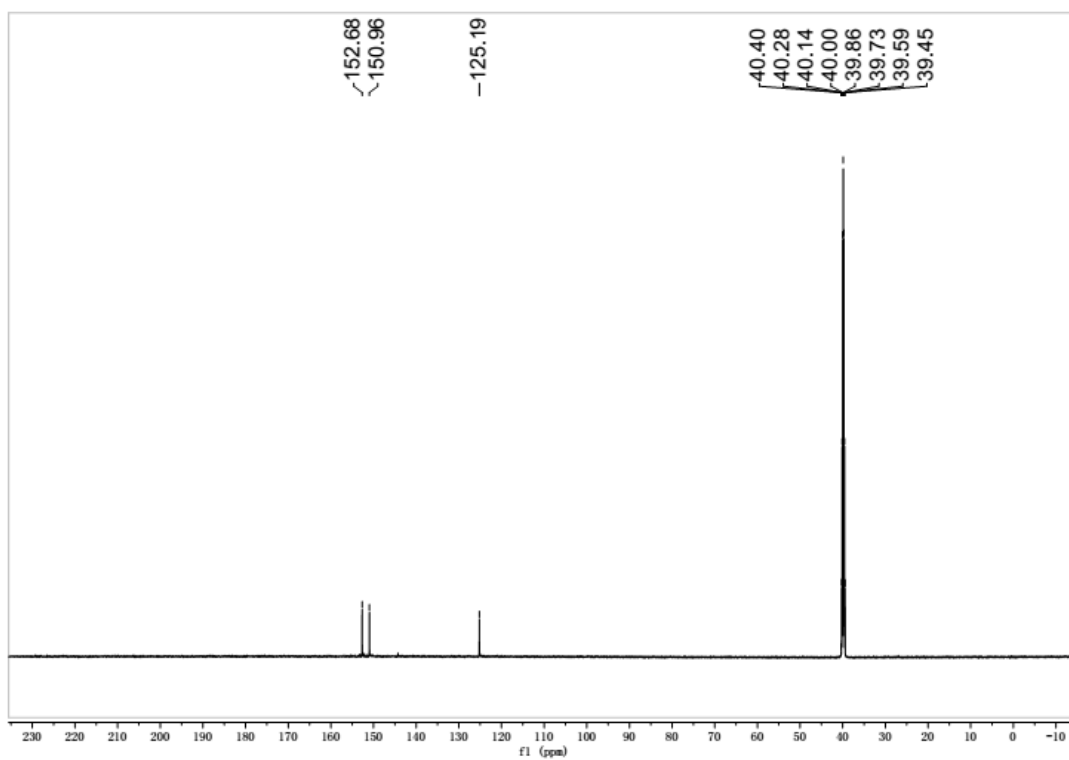

Fig.S17 <sup>13</sup>C NMR for compound 8

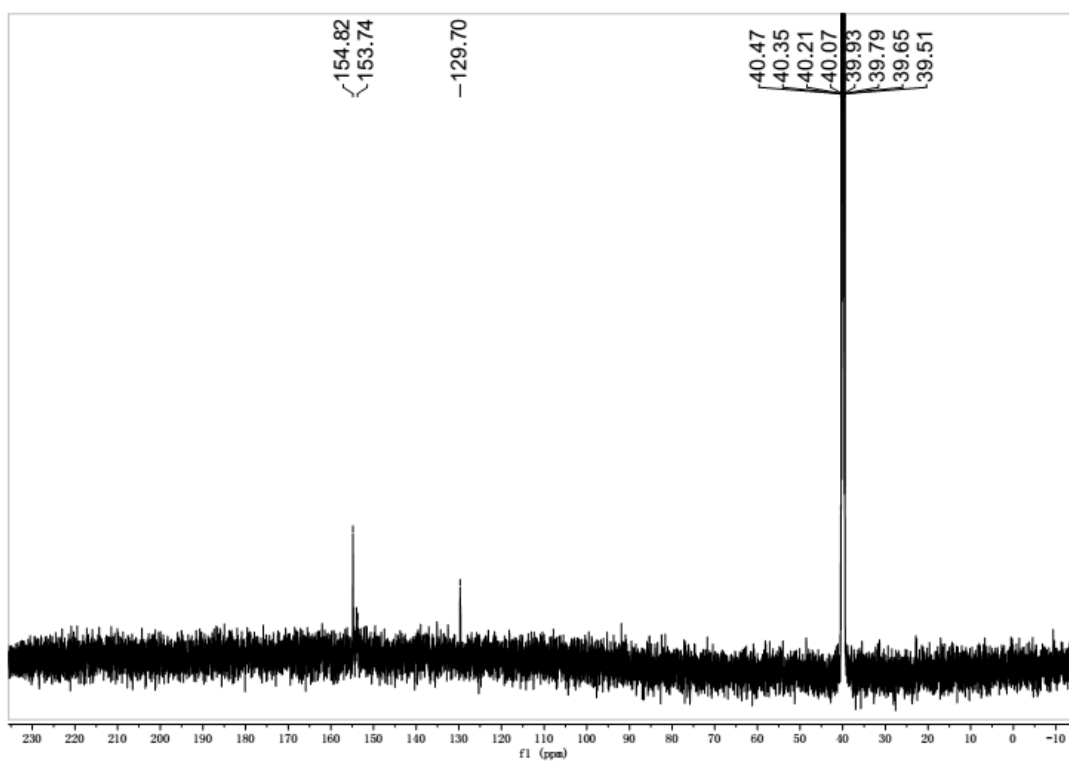

Fig.S18 <sup>13</sup>C NMR for compound 9

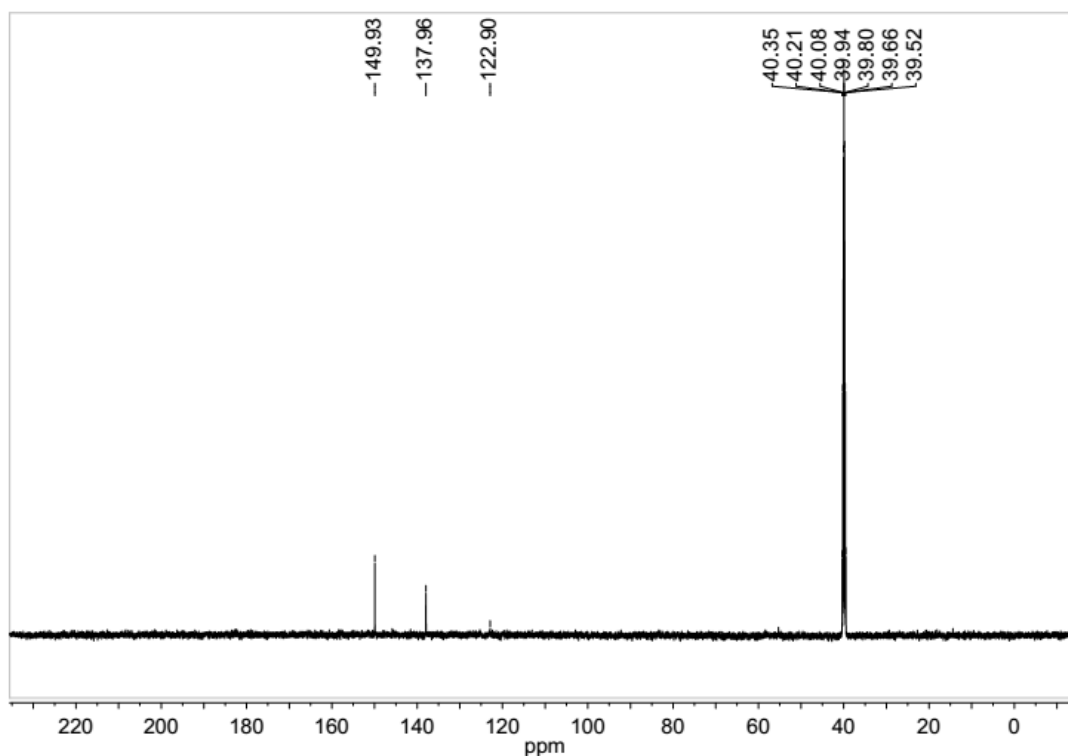

Fig.S19  $^{13}\text{C}$  NMR for compound **14**

## Computational details

For neutral compounds **5**, **14**, anion and cations, the geometric optimization, frequency analysis and single-point energies were accomplished by using the M06-2X functional with the 6-311++G\*\* basis set.<sup>4</sup> The atomization energies were obtained by employing the CBS-4M *ab initio* method<sup>5</sup> and solid phase heat of formation was computed via isodesmic reactions. For neutral compounds such as **5** and **14**, the solid-state heat of formation can be estimated by subtracting the heats of formation from gas-phase heats of formation. The heat of sublimation can be estimated following the Trouton's rule,<sup>6</sup> which is shown in the equation (1):

$$\Delta H_{\text{sub}} = 188/\text{J mol}^{-1}\text{K}^{-1}T \quad (1)$$

Here,  $T$  represents either the melting point or the decomposition temperature when no melting occurs prior to decomposition.<sup>7</sup> For ionic derivatives (**6–9**), the solid phase heat of formation was calculated based on the Born-Haber energy cycle which is shown in Scheme S1.<sup>8</sup>

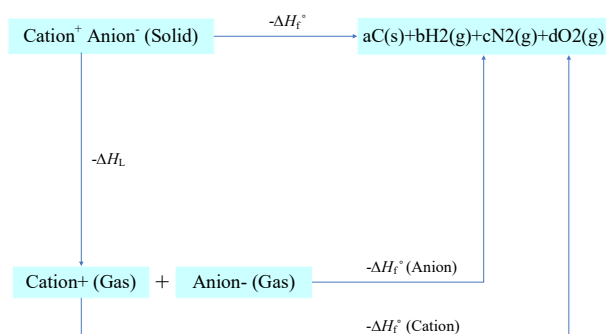

Scheme S1 Born-Haber Cycle for the formation of salts (**6–9**)

Based on a Born-Haber energy cycle, the HOF of energetic salt can be simplified as the following equation:

$$\Delta H_f^\circ(\text{salt}, 298\text{K}) = \Delta H_f^\circ(\text{cation}, 298\text{K}) + \Delta H_f^\circ(\text{anion}, 298\text{K}) - \Delta H_L \quad (2)$$

Where  $\Delta H_L$  is the lattice energy of salts which can be predicted by the following formula:

$$\Delta H_L = U_{\text{POT}} + [p((n_M/2-2) + q(n_X/2-2))]RT \quad (3)$$

Where  $n_M$  and  $n_X$  depend on the numbers of the ions  $M_{p+}$  and  $X_{q-}$ , respectively, which are equal to 3 for monatomic ions, 5 for linear polyatomic ions, and 6 for nonlinear polyatomic ions. The lattice potential energy  $U_{\text{POT}}$  can be estimated by using the following equation:

$$U_{\text{POT}} = \gamma(\rho/M)^{1/3} + \delta \quad (4)$$

Where  $\rho$  is the density and  $M$  is the formula mass of the ionic materials. For 1:1 (charge ratio) salts, the coefficients  $\gamma$  and  $\delta$  are 1981.2 kJ mol<sup>-1</sup> cm<sup>-1</sup> and 103.8 kJ mol<sup>-1</sup>, respectively. For 1:2 salts, the coefficients  $\gamma$  and  $\delta$  are 8375.6 kJ mol<sup>-1</sup> and -178.8 kJ mol<sup>-1</sup>, respectively. All the detonation and combustion performance were performed using the EXPLO 5 (V6.02) program.<sup>9</sup> The ESP charges were calculated by using Multiwfn 3.3.9 code<sup>10</sup> at the M06-D3/aug-cc-pVDZ level.<sup>11</sup>

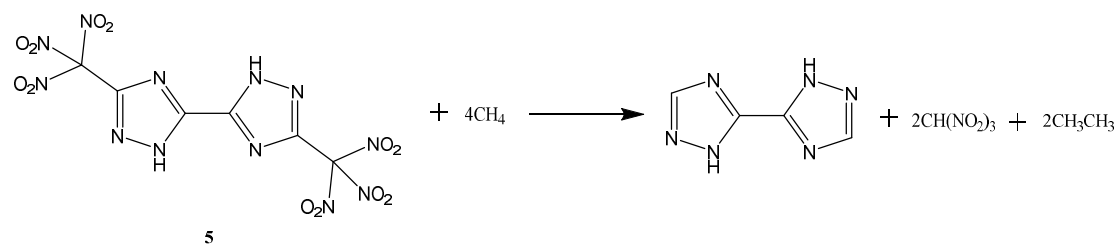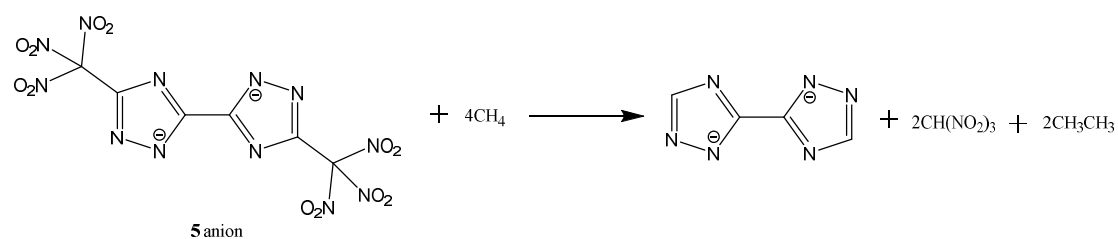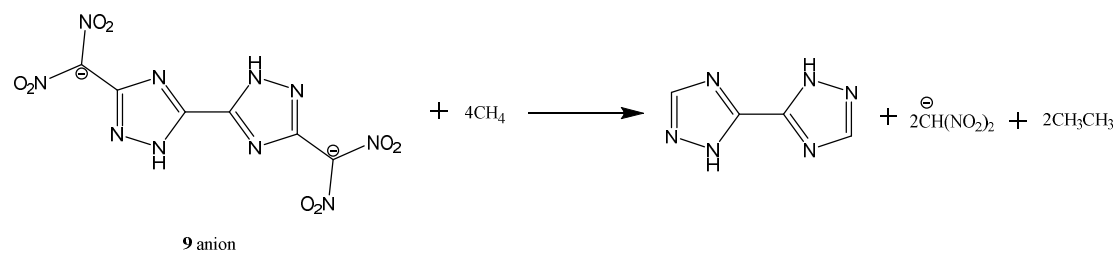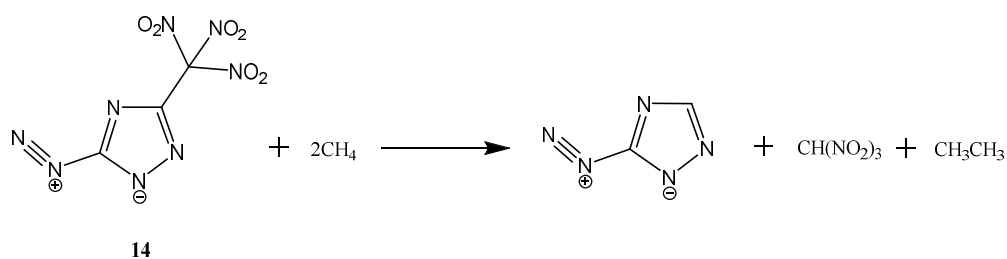

**Fig.S20** Optimized molecular structure, Cartesian coordinates of optimized geometry and the corresponding absolute energies of **5**

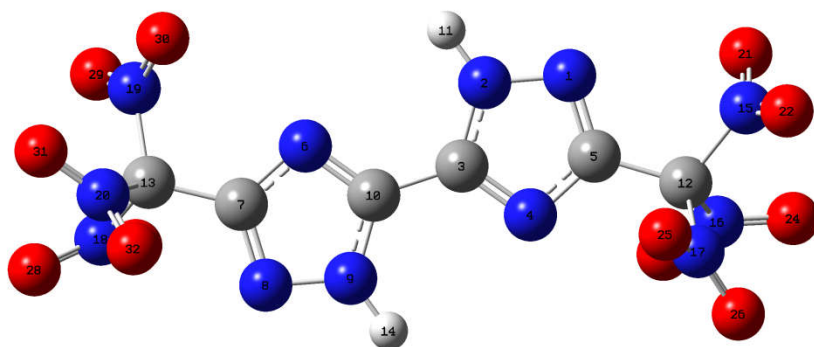

| Center Number | Atomic Number | Atomic Type | Coordinates (Angstroms) |           |           |
|---------------|---------------|-------------|-------------------------|-----------|-----------|
|               |               |             | X                       | Y         | Z         |
| 1             | 7             | 0           | 2.383936                | 1.676851  | -0.050085 |
| 2             | 7             | 0           | 1.057593                | 1.564658  | -0.038693 |
| 3             | 6             | 0           | 0.703249                | 0.265003  | -0.010525 |
| 4             | 7             | 0           | 1.772272                | -0.496504 | 0.000498  |
| 5             | 6             | 0           | 2.768232                | 0.419155  | -0.031807 |
| 6             | 7             | 0           | -1.740547               | 0.577294  | -0.011788 |
| 7             | 6             | 0           | -2.739154               | -0.332369 | 0.019296  |
| 8             | 7             | 0           | -2.357773               | -1.592755 | 0.044841  |
| 9             | 7             | 0           | -1.033427               | -1.487145 | 0.040117  |
| 10            | 6             | 0           | -0.673210               | -0.190421 | 0.005985  |
| 11            | 1             | 0           | 0.460008                | 2.382556  | -0.046556 |
| 12            | 6             | 0           | 4.195906                | 0.002659  | -0.003865 |
| 13            | 6             | 0           | -4.187397               | 0.010704  | 0.000298  |
| 14            | 1             | 0           | -0.439037               | -2.307527 | 0.053260  |
| 15            | 7             | 0           | 5.136813                | 1.172191  | 0.287927  |
| 16            | 7             | 0           | 4.688590                | -0.611168 | -1.327644 |
| 17            | 7             | 0           | 4.387864                | -1.068890 | 1.083805  |
| 18            | 7             | 0           | -4.932160               | -0.874058 | -1.017065 |
| 19            | 7             | 0           | -4.411255               | 1.476066  | -0.376719 |
| 20            | 7             | 0           | -4.896953               | -0.184663 | 1.357418  |
| 21            | 8             | 0           | 5.133389                | 2.018837  | -0.560737 |
| 22            | 8             | 0           | 5.775889                | 1.124000  | 1.300199  |
| 23            | 8             | 0           | 3.842600                | -1.112268 | -2.014801 |
| 24            | 8             | 0           | 5.870108                | -0.553219 | -1.516030 |
| 25            | 8             | 0           | 3.875519                | -0.802698 | 2.133990  |
| 26            | 8             | 0           | 5.016595                | -2.043621 | 0.781732  |

|    |   |   |           |           |           |
|----|---|---|-----------|-----------|-----------|
| 27 | 8 | 0 | -4.386811 | -0.977393 | -2.078448 |
| 28 | 8 | 0 | -5.970316 | -1.352591 | -0.656392 |
| 29 | 8 | 0 | -4.998191 | 1.698857  | -1.397313 |
| 30 | 8 | 0 | -3.966677 | 2.254007  | 0.419669  |
| 31 | 8 | 0 | -5.865798 | 0.496935  | 1.536513  |
| 32 | 8 | 0 | -4.427731 | -1.024167 | 2.072710  |

---

|                                              |                             |
|----------------------------------------------|-----------------------------|
| Zero-point correction=                       | 0.174030 (Hartree/Particle) |
| Thermal correction to Energy=                | 0.199088                    |
| Thermal correction to Enthalpy=              | 0.200032                    |
| Thermal correction to Gibbs Free Energy=     | 0.113109                    |
| Sum of electronic and zero-point Energies=   | -1788.523928                |
| Sum of electronic and thermal Energies=      | -1788.498869                |
| Sum of electronic and thermal Enthalpies=    | -1788.497925                |
| Sum of electronic and thermal Free Energies= | -1788.584848                |

**Fig.S21** Optimized molecular structure, Cartesian coordinates of optimized geometry and the corresponding absolute energies of **5** anion

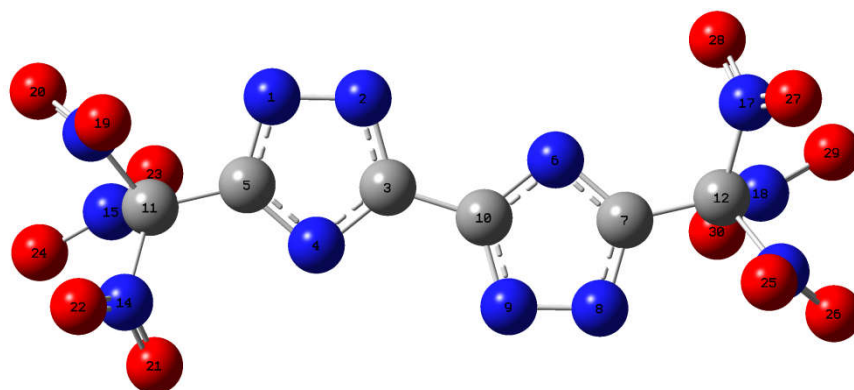


---

| Center Number | Atomic Number | Atomic Type | Coordinates (Angstroms) |           |          |
|---------------|---------------|-------------|-------------------------|-----------|----------|
|               |               |             | X                       | Y         | Z        |
| 1             | 7             | 0           | -2.370568               | 1.571526  | 0.266273 |
| 2             | 7             | 0           | -1.042437               | 1.531641  | 0.279446 |
| 3             | 6             | 0           | -0.699153               | 0.228495  | 0.162755 |
| 4             | 7             | 0           | -1.752578               | -0.597573 | 0.068386 |
| 5             | 6             | 0           | -2.751291               | 0.292973  | 0.141111 |
| 6             | 7             | 0           | 1.752650                | 0.597483  | 0.068402 |
| 7             | 6             | 0           | 2.751346                | -0.293084 | 0.141167 |
| 8             | 7             | 0           | 2.370602                | -1.571629 | 0.266284 |

|    |   |   |           |           |           |
|----|---|---|-----------|-----------|-----------|
| 9  | 7 | 0 | 1.042472  | -1.531719 | 0.279423  |
| 10 | 6 | 0 | 0.699208  | -0.228560 | 0.162766  |
| 11 | 6 | 0 | -4.170226 | -0.016532 | 0.009936  |
| 12 | 6 | 0 | 4.170260  | 0.016480  | 0.009949  |
| 13 | 7 | 0 | -5.021004 | 1.074068  | 0.690252  |
| 14 | 7 | 0 | -4.558783 | -1.393726 | 0.558660  |
| 15 | 7 | 0 | -4.738177 | -0.073265 | -1.463955 |
| 16 | 7 | 0 | 5.021072  | -1.074295 | 0.689783  |
| 17 | 7 | 0 | 4.558770  | 1.393551  | 0.559115  |
| 18 | 7 | 0 | 4.738091  | 0.073770  | -1.463983 |
| 19 | 8 | 0 | -4.845228 | 1.226360  | 1.862754  |
| 20 | 8 | 0 | -5.782884 | 1.695068  | -0.014482 |
| 21 | 8 | 0 | -4.135281 | -2.320001 | -0.073970 |
| 22 | 8 | 0 | -5.235137 | -1.446502 | 1.557322  |
| 23 | 8 | 0 | -4.096405 | 0.474162  | -2.309457 |
| 24 | 8 | 0 | -5.790104 | -0.654364 | -1.606677 |
| 25 | 8 | 0 | 4.845655  | -1.226797 | 1.862311  |
| 26 | 8 | 0 | 5.782654  | -1.695238 | -0.015296 |
| 27 | 8 | 0 | 5.234855  | 1.446025  | 1.557975  |
| 28 | 8 | 0 | 4.135404  | 2.319996  | -0.073369 |
| 29 | 8 | 0 | 5.790124  | 0.654730  | -1.606508 |
| 30 | 8 | 0 | 4.096142  | -0.473120 | -2.309691 |

---

|                                              |                             |
|----------------------------------------------|-----------------------------|
| Zero-point correction=                       | 0.145831 (Hartree/Particle) |
| Thermal correction to Energy=                | 0.170567                    |
| Thermal correction to Enthalpy=              | 0.171511                    |
| Thermal correction to Gibbs Free Energy=     | 0.086345                    |
| Sum of electronic and zero-point Energies=   | -1787.462908                |
| Sum of electronic and thermal Energies=      | -1787.438172                |
| Sum of electronic and thermal Enthalpies=    | -1787.437228                |
| Sum of electronic and thermal Free Energies= | -1787.522394                |

**Fig.S22** Optimized molecular structure, Cartesian coordinates of optimized geometry and the corresponding absolute energies of **9** anion

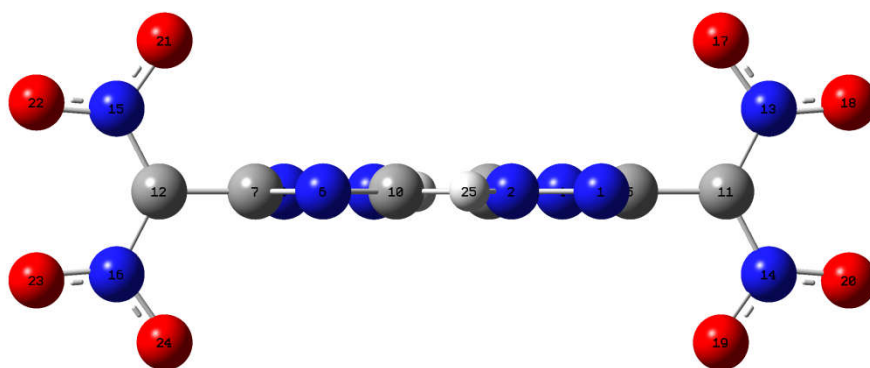

| Center Number | Atomic Number | Atomic Type | Coordinates (Angstroms) |           |           |
|---------------|---------------|-------------|-------------------------|-----------|-----------|
|               |               |             | X                       | Y         | Z         |
| 1             | 7             | 0           | 2.355526                | 0.001166  | 1.667558  |
| 2             | 7             | 0           | 1.020988                | 0.001069  | 1.532075  |
| 3             | 6             | 0           | 0.689172                | 0.000103  | 0.230274  |
| 4             | 7             | 0           | 1.773760                | -0.000332 | -0.511065 |
| 5             | 6             | 0           | 2.780620                | 0.000341  | 0.415261  |
| 6             | 7             | 0           | -1.773801               | 0.000397  | 0.510944  |
| 7             | 6             | 0           | -2.780639               | -0.000394 | -0.415393 |
| 8             | 7             | 0           | -2.355559               | -0.001496 | -1.667674 |
| 9             | 7             | 0           | -1.021023               | -0.001487 | -1.532193 |
| 10            | 6             | 0           | -0.689200               | -0.000251 | -0.230390 |
| 11            | 6             | 0           | 4.206572                | 0.000041  | 0.072917  |
| 12            | 6             | 0           | -4.206609               | 0.000018  | -0.072955 |
| 13            | 7             | 0           | 4.838757                | 1.225476  | -0.107235 |
| 14            | 7             | 0           | 4.838254                | -1.225712 | -0.107003 |
| 15            | 7             | 0           | -4.838293               | 1.225848  | 0.106639  |
| 16            | 7             | 0           | -4.838708               | -1.225378 | 0.107776  |
| 17            | 8             | 0           | 4.127329                | 2.232794  | 0.052196  |
| 18            | 8             | 0           | 6.028096                | 1.315203  | -0.403762 |
| 19            | 8             | 0           | 4.126526                | -2.232691 | 0.053232  |
| 20            | 8             | 0           | 6.027386                | -1.315984 | -0.404170 |
| 21            | 8             | 0           | -4.126523               | 2.232784  | -0.053871 |
| 22            | 8             | 0           | -6.027420               | 1.316243  | 0.403744  |
| 23            | 8             | 0           | -6.028039               | -1.315095 | 0.404343  |
| 24            | 8             | 0           | -4.127199               | -2.232680 | -0.051326 |
| 25            | 1             | 0           | 0.396354                | 0.001336  | 2.323725  |
| 26            | 1             | 0           | -0.396405               | -0.001915 | -2.323856 |

Zero-point correction=

0.143177 (Hartree/Particle)

|                                              |              |
|----------------------------------------------|--------------|
| Thermal correction to Energy=                | 0.162764     |
| Thermal correction to Enthalpy=              | 0.163709     |
| Thermal correction to Gibbs Free Energy=     | 0.089405     |
| Sum of electronic and zero-point Energies=   | -1378.571909 |
| Sum of electronic and thermal Energies=      | -1378.552322 |
| Sum of electronic and thermal Enthalpies=    | -1378.551378 |
| Sum of electronic and thermal Free Energies= | -1378.625681 |

**Fig.S23** Optimized molecular structure, Cartesian coordinates of optimized geometry and the corresponding absolute energies of **14**

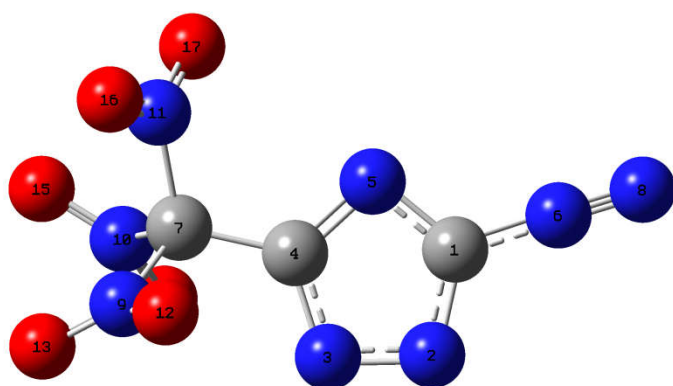

| Center Number | Atomic Number | Atomic Type | Coordinates (Angstroms) |           |           |
|---------------|---------------|-------------|-------------------------|-----------|-----------|
|               |               |             | X                       | Y         | Z         |
| 1             | 6             | 0           | 2.576296                | -0.130953 | -0.020044 |
| 2             | 7             | 0           | 2.327743                | -1.454639 | -0.104817 |
| 3             | 7             | 0           | 1.026238                | -1.519368 | -0.102918 |
| 4             | 6             | 0           | 0.575423                | -0.236604 | -0.021787 |
| 5             | 7             | 0           | 1.518411                | 0.685003  | 0.038224  |
| 6             | 7             | 0           | 3.855808                | 0.333741  | 0.009335  |
| 7             | 6             | 0           | -0.885096               | 0.038094  | 0.003201  |
| 8             | 7             | 0           | 4.898966                | 0.685398  | 0.029806  |
| 9             | 7             | 0           | -1.585446               | -0.983806 | 0.916214  |
| 10            | 7             | 0           | -1.555685               | -0.059615 | -1.381995 |
| 11            | 7             | 0           | -1.202367               | 1.445769  | 0.508605  |
| 12            | 8             | 0           | -1.068227               | -1.123249 | 1.987337  |
| 13            | 8             | 0           | -2.562304               | -1.523383 | 0.477965  |
| 14            | 8             | 0           | -0.994059               | -0.750603 | -2.184563 |
| 15            | 8             | 0           | -2.585134               | 0.543240  | -1.502118 |
| 16            | 8             | 0           | -1.830239               | 1.540743  | 1.525104  |
| 17            | 8             | 0           | -0.783212               | 2.319428  | -0.198149 |



|                                              |                             |
|----------------------------------------------|-----------------------------|
| Zero-point correction=                       | 0.081751 (Hartree/Particle) |
| Thermal correction to Energy=                | 0.095634                    |
| Thermal correction to Enthalpy=              | 0.096578                    |
| Thermal correction to Gibbs Free Energy=     | 0.038605                    |
| Sum of electronic and zero-point Energies=   | -1003.059634                |
| Sum of electronic and thermal Energies=      | -1003.045751                |
| Sum of electronic and thermal Enthalpies=    | -1003.044807                |
| Sum of electronic and thermal Free Energies= | -1003.102781                |

**Scheme S2.** Isodesmic reactions for **5**, **5** anion, **9** anion and **14**

**Table S18.** Calculated the solid-state heat of formation (HOF) of neutral compounds **5** and **14**

| Compound  | $\Delta H_f$<br>(kJ mol <sup>-1</sup> ) | $\Delta H_{sub}$<br>(kJ mol <sup>-1</sup> ) | $\Delta H_{f,s}^{298}$<br>(kJ mol <sup>-1</sup> ) |
|-----------|-----------------------------------------|---------------------------------------------|---------------------------------------------------|
| <b>5</b>  | 339.7                                   | 27.8                                        | 311.9                                             |
| <b>14</b> | 545.5                                   | 23.8                                        | 521.7                                             |

**Table S19.** Calculated the solid-state heat of formation (HOF) of energetic salts **6–8** and **9**

| Compound | $\Delta H_L$<br>(kJ mol <sup>-1</sup> ) | $\Delta H_f^{Cation}$<br>(kJ mol <sup>-1</sup> ) | $\Delta H_f^{Anion}$<br>(kJ mol <sup>-1</sup> ) | $\Delta H_{f,s}^{298}$<br>(kJ mol <sup>-1</sup> ) |
|----------|-----------------------------------------|--------------------------------------------------|-------------------------------------------------|---------------------------------------------------|
| <b>6</b> | 1152.6                                  | 626.4                                            | -145.3                                          | -45.1                                             |
| <b>7</b> | 1143.8                                  | 770.0                                            | -145.3                                          | 250.9                                             |
| <b>8</b> | 1148.8                                  | 669.5                                            | -145.3                                          | 44.9                                              |
| <b>9</b> | 1264.3                                  | 501.1                                            | 3.9                                             | -258.2                                            |

**References**

- [1] (a) G. M. Sheldrick, SHELXS-97, *Program for solution of crystal structures*, University of Gottingen, Germany, 1997; (b) G. M. Sheldrick, SHELXL-97, *Program for refinement of crystal structures*, University of Gottingen, Germany, 1997.
- [2] (a) L. D. Popov, I. N. Shcherbakov, Yu. N. Tkachenko, S. A. Borodkin and V. A. Kogan, *Russ. J. Gen. Chem.*, 2006, **76**, 1219–1225; (b) V. M. Chernyshev, A. V. Chernysheva and V. A. Taranushich, *Russ. J. Appl. Chem.*, 2009, **82**, 276–281.
- [3] V. V. Kiseleva, A. A. Gakh and A. A. Fainzil'berg, *Izv. Akad. Ser. Khim.*, **1990**, 9, 1888–1895 (in Russian).
- [4] M. Head-Gordon, J. A. Pople, MP2 Energy Evaluation by Direct Methods, *Chem. Phys. Lett.*, 1988, **153**, 503-506.
- [5] J. Oláh and C. V. Alsenoy, *J. Phys. Chem. A*, 2002, **106**, 3885-3890.
- [6] a) F. Trouton, *Philos. Mag.*, 1884, **18**, 54-57; b) M. S. Westwell, M. S. Searle, D. J. Wales and D. H. Williams, *J. Am. Chem. Soc.*, 1995, **117**, 5013-5015.
- [7] a) R. A. Kendall, T. H. Dunning Jr. and R. J. Harrison, *J. Chem. Phys.*, 1992, **96**, 6796; b) T. H. Dunning Jr. and D. E. Woon, *J. Chem. Phys.*, 1994, **100**, 2975; c) D. E. Woon and T. H. Dunning Jr., *J. Chem. Phys.*, 1993, **98**, 1358.
- [8] H. D. B. Jenkins, D. Tudela and L. Glasser, *Inorg. Chem.*, 2002, **41**, 2364.
- [9] M. Sućeska, *EXPLO5, version 6.02*, 2013.
- [10] T. Lu and F. Chen, *J. Comput. Chem.*, 2012, **33**, 580-592.
- [11] a) S. Grimme, J. Antony, S. Ehrlich and H. Krieg, *J. Chem. Phys.*, 2010, **132**, 154104; b) S. Grimme, S. Ehrlich and L. Goerigk, *J. Comput. Chem.*, 2011, **32**, 1456.
